# Supplementary material for: Anti-Inflammatory, Neurotrophic, and Cytotoxic Oxylipins Isolated from Chaenomeles sinensis Twigs
Source: MDPI journal article supplement (doi:10.3390/antiox12020284), 2023-01-27

# Anti-inflammatory, Neurotrophic, and Cytotoxic Oxylipins Isolated from *Chaenomeles sinensis* Twigs

Da Yeong Lee,<sup>1,#</sup> Kyoung Jin Park,<sup>2,#</sup> Subedi Lalita,<sup>3</sup> Gyusung Lee,<sup>1</sup> Ji-Hyeok Lee,<sup>4</sup> Won-Min Lee,<sup>1</sup>  
Sang Un Choi,<sup>5</sup> Seong-Min Hong,<sup>6</sup> Sun Yeou Kim,<sup>3,6</sup> Chung Sub Kim<sup>1,2,4,\*</sup>

<sup>1</sup>Department of Biopharmaceutical Convergence, Sungkyunkwan University, Suwon 16419, Republic of Korea

<sup>2</sup>School of Pharmacy, Sungkyunkwan University, Suwon 16419, Republic of Korea

<sup>3</sup>Gachon Institute of Pharmaceutical Science, Gachon University, Incheon 21936, Korea

<sup>4</sup>Department of Biohealth Regulatory Science, Sungkyunkwan University, Suwon 16419, Republic of Korea

<sup>5</sup>Korea Research Institute of Chemical Technology, Daejeon 34114, Korea

<sup>6</sup>College of Pharmacy, Gachon University, #191, Hambakmoero, Yeonsu-gu, Incheon 21936, Korea

<sup>#</sup>These authors contributed equally to this work.

## Contents

|                                                                                               |    |
|-----------------------------------------------------------------------------------------------|----|
| <b>Figure S1.</b> HRFABMS spectrum of <b>1</b> .....                                          | 1  |
| <b>Figure S2.</b> $^1\text{H}$ NMR spectrum of <b>1</b> in methanol- $d_4$ (700 MHz).....     | 2  |
| <b>Figure S3.</b> $^{13}\text{C}$ NMR spectrum of <b>1</b> in methanol- $d_4$ (175 MHz).....  | 3  |
| <b>Figure S4.</b> COSY spectrum of <b>1</b> in methanol- $d_4$ .....                          | 4  |
| <b>Figure S5.</b> HSQC spectrum of <b>1</b> in methanol- $d_4$ .....                          | 5  |
| <b>Figure S6.</b> HMBC spectrum of <b>1</b> in methanol- $d_4$ .....                          | 6  |
| <b>Figure S7.</b> HRFABMS spectrum of <b>2</b> .....                                          | 7  |
| <b>Figure S8.</b> $^1\text{H}$ NMR spectrum of <b>2</b> in methanol- $d_4$ (700 MHz).....     | 8  |
| <b>Figure S9.</b> $^{13}\text{C}$ NMR spectrum of <b>2</b> in methanol- $d_4$ (175 MHz).....  | 9  |
| <b>Figure S10.</b> COSY spectrum of <b>2</b> in methanol- $d_4$ .....                         | 10 |
| <b>Figure S11.</b> HSQC spectrum of <b>2</b> in methanol- $d_4$ .....                         | 11 |
| <b>Figure S12.</b> HMBC spectrum of <b>2</b> in methanol- $d_4$ .....                         | 12 |
| <b>Figure S13.</b> HRFABMS spectrum of <b>3</b> .....                                         | 13 |
| <b>Figure S14.</b> $^1\text{H}$ NMR spectrum of <b>3</b> in chloroform- $d$ (700 MHz) .....   | 14 |
| <b>Figure S15.</b> $^{13}\text{C}$ NMR spectrum of <b>3</b> in chloroform- $d$ (175 MHz)..... | 15 |
| <b>Figure S16.</b> COSY spectrum of <b>3</b> in chloroform- $d$ .....                         | 16 |
| <b>Figure S17.</b> HSQC spectrum of <b>3</b> in chloroform- $d$ .....                         | 17 |
| <b>Figure S18.</b> HMBC spectrum of <b>3</b> in chloroform- $d$ .....                         | 18 |
| <b>Figure S19.</b> HRFABMS spectrum of <b>4</b> .....                                         | 19 |
| <b>Figure S20.</b> $^1\text{H}$ NMR spectrum of <b>4</b> in chloroform- $d$ (700 MHz) .....   | 20 |
| <b>Figure S21.</b> $^{13}\text{C}$ NMR spectrum of <b>4</b> in chloroform- $d$ (175 MHz)..... | 21 |
| <b>Figure S22.</b> COSY spectrum of <b>4</b> in chloroform- $d$ .....                         | 22 |
| <b>Figure S23.</b> HSQC spectrum of <b>4</b> in chloroform- $d$ .....                         | 23 |
| <b>Figure S24.</b> HMBC spectrum of <b>4</b> in chloroform- $d$ .....                         | 24 |

**Figure S1.** HRFABMS spectrum of **1**

140926\_MGBC13\_007-c3 #137-159 RT: 2.45-2.84 AV: 23 SB: 22 0.00-0.38 NL: 6.67E4  
T: + c FAB Full ms [229.50-380.50]

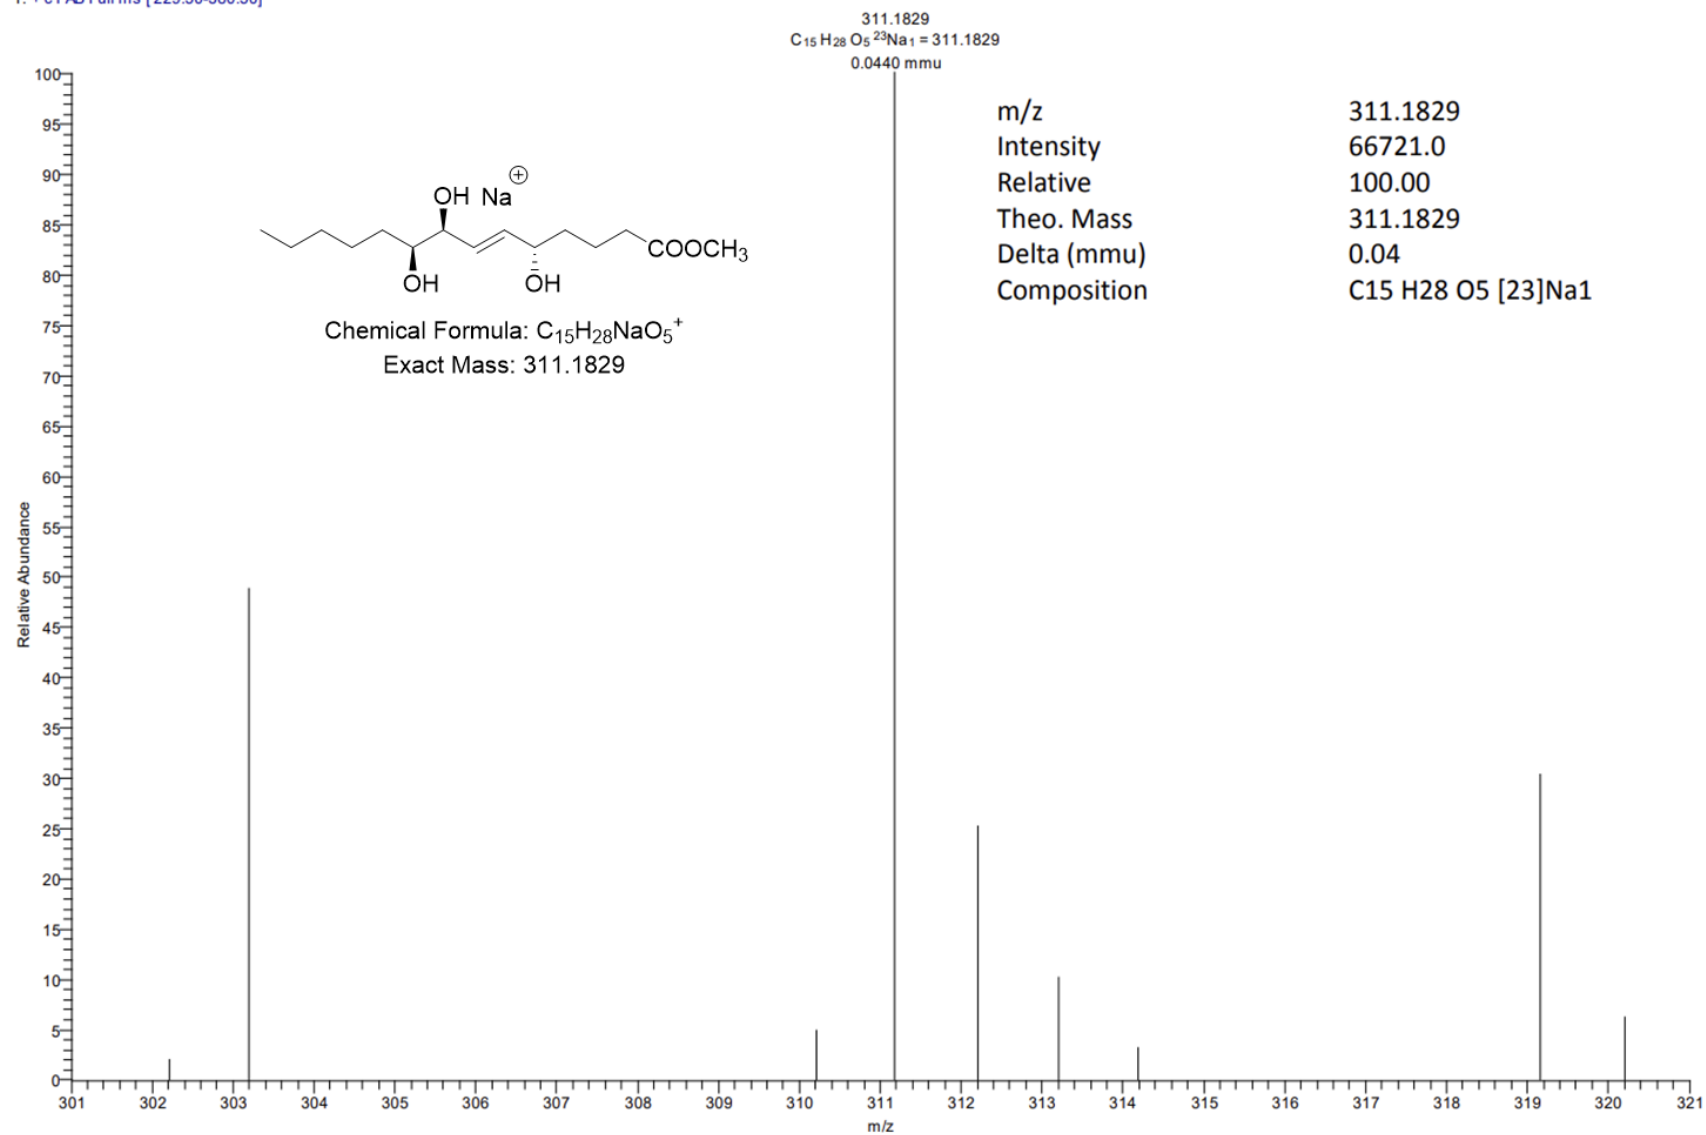

**Figure S2.**  $^1\text{H}$  NMR spectrum of **1** in methanol- $d_4$  (700 MHz)

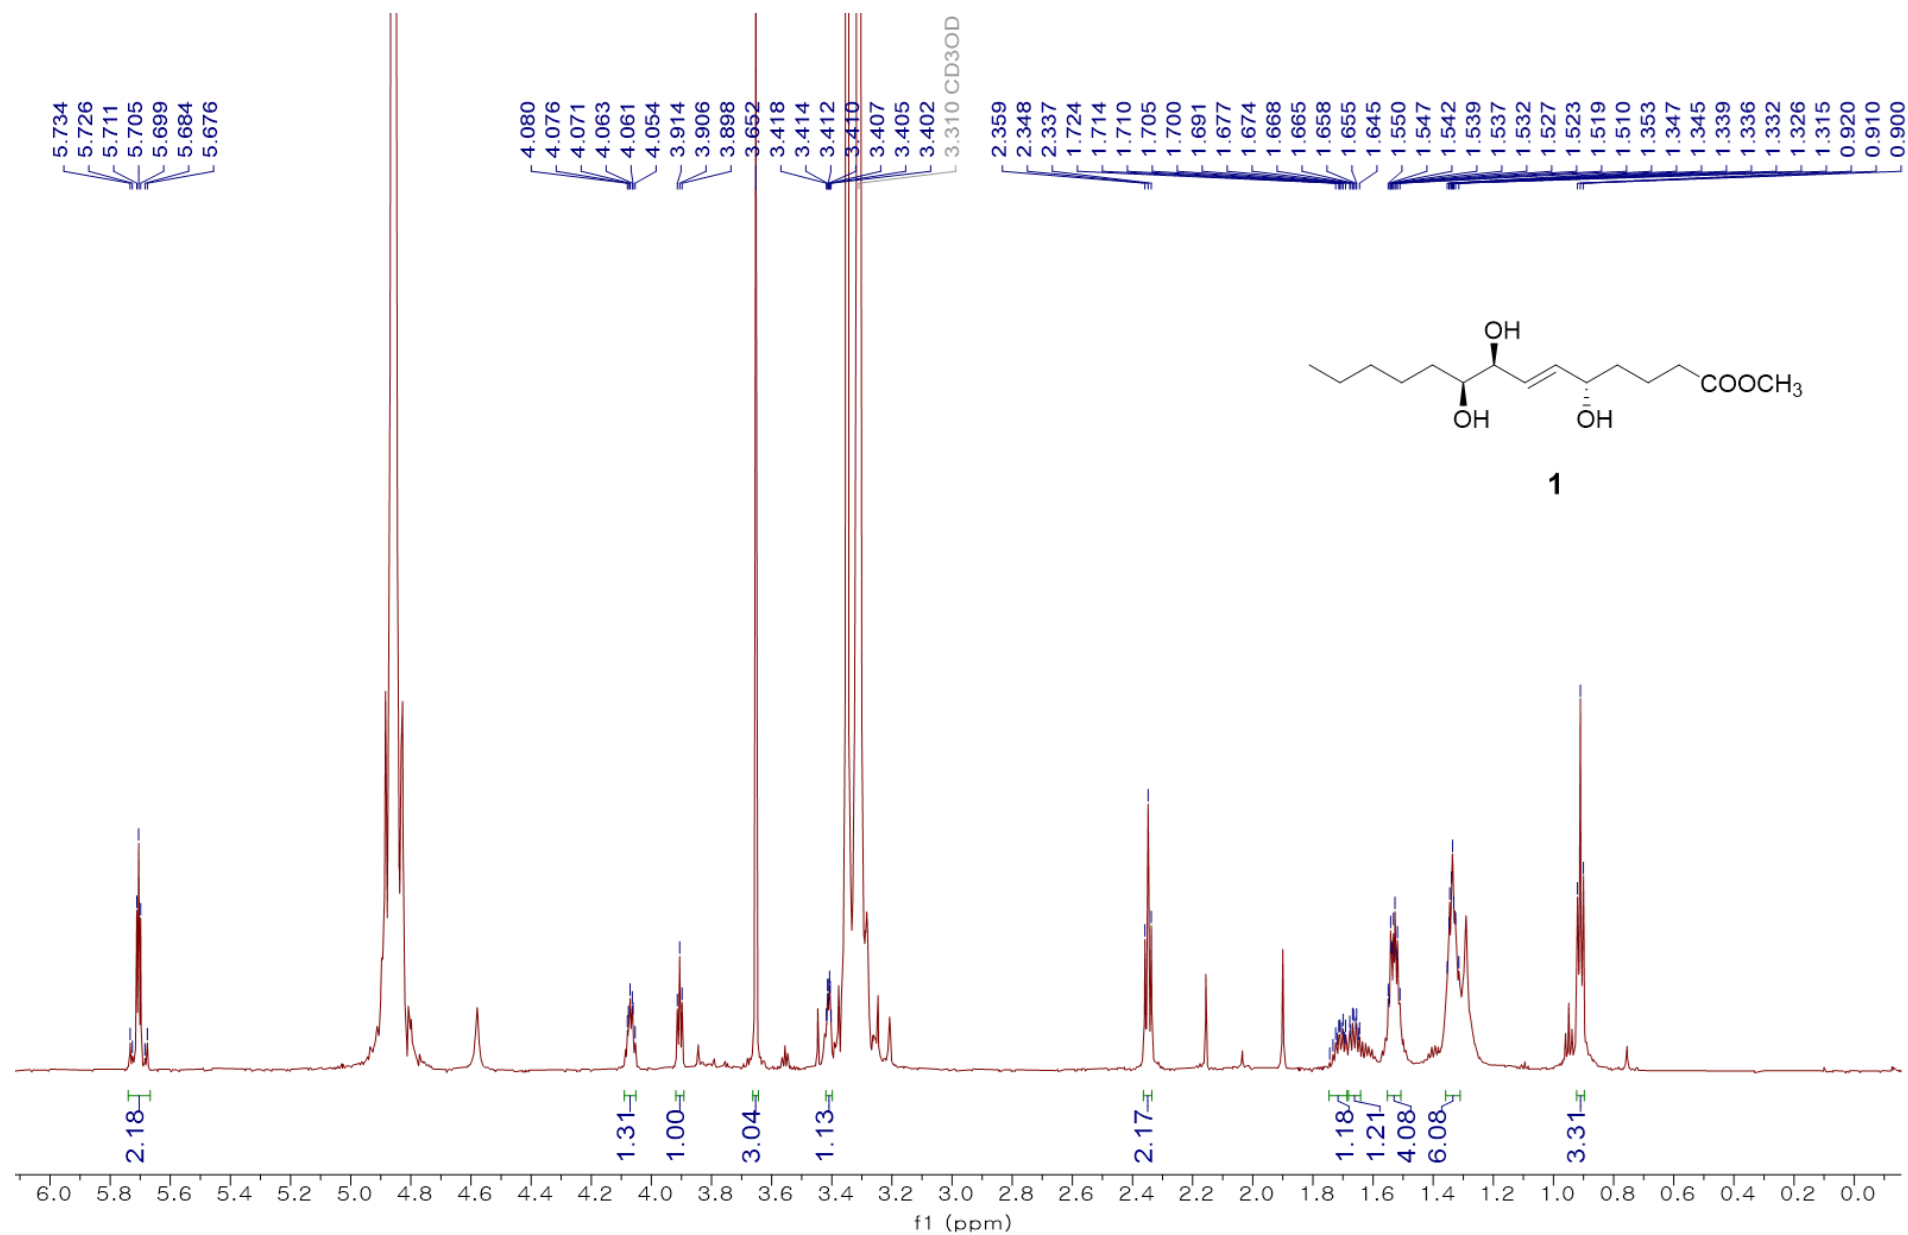

**Figure S3.**  $^{13}\text{C}$  NMR spectrum of **1** in methanol- $d_4$  (175 MHz)

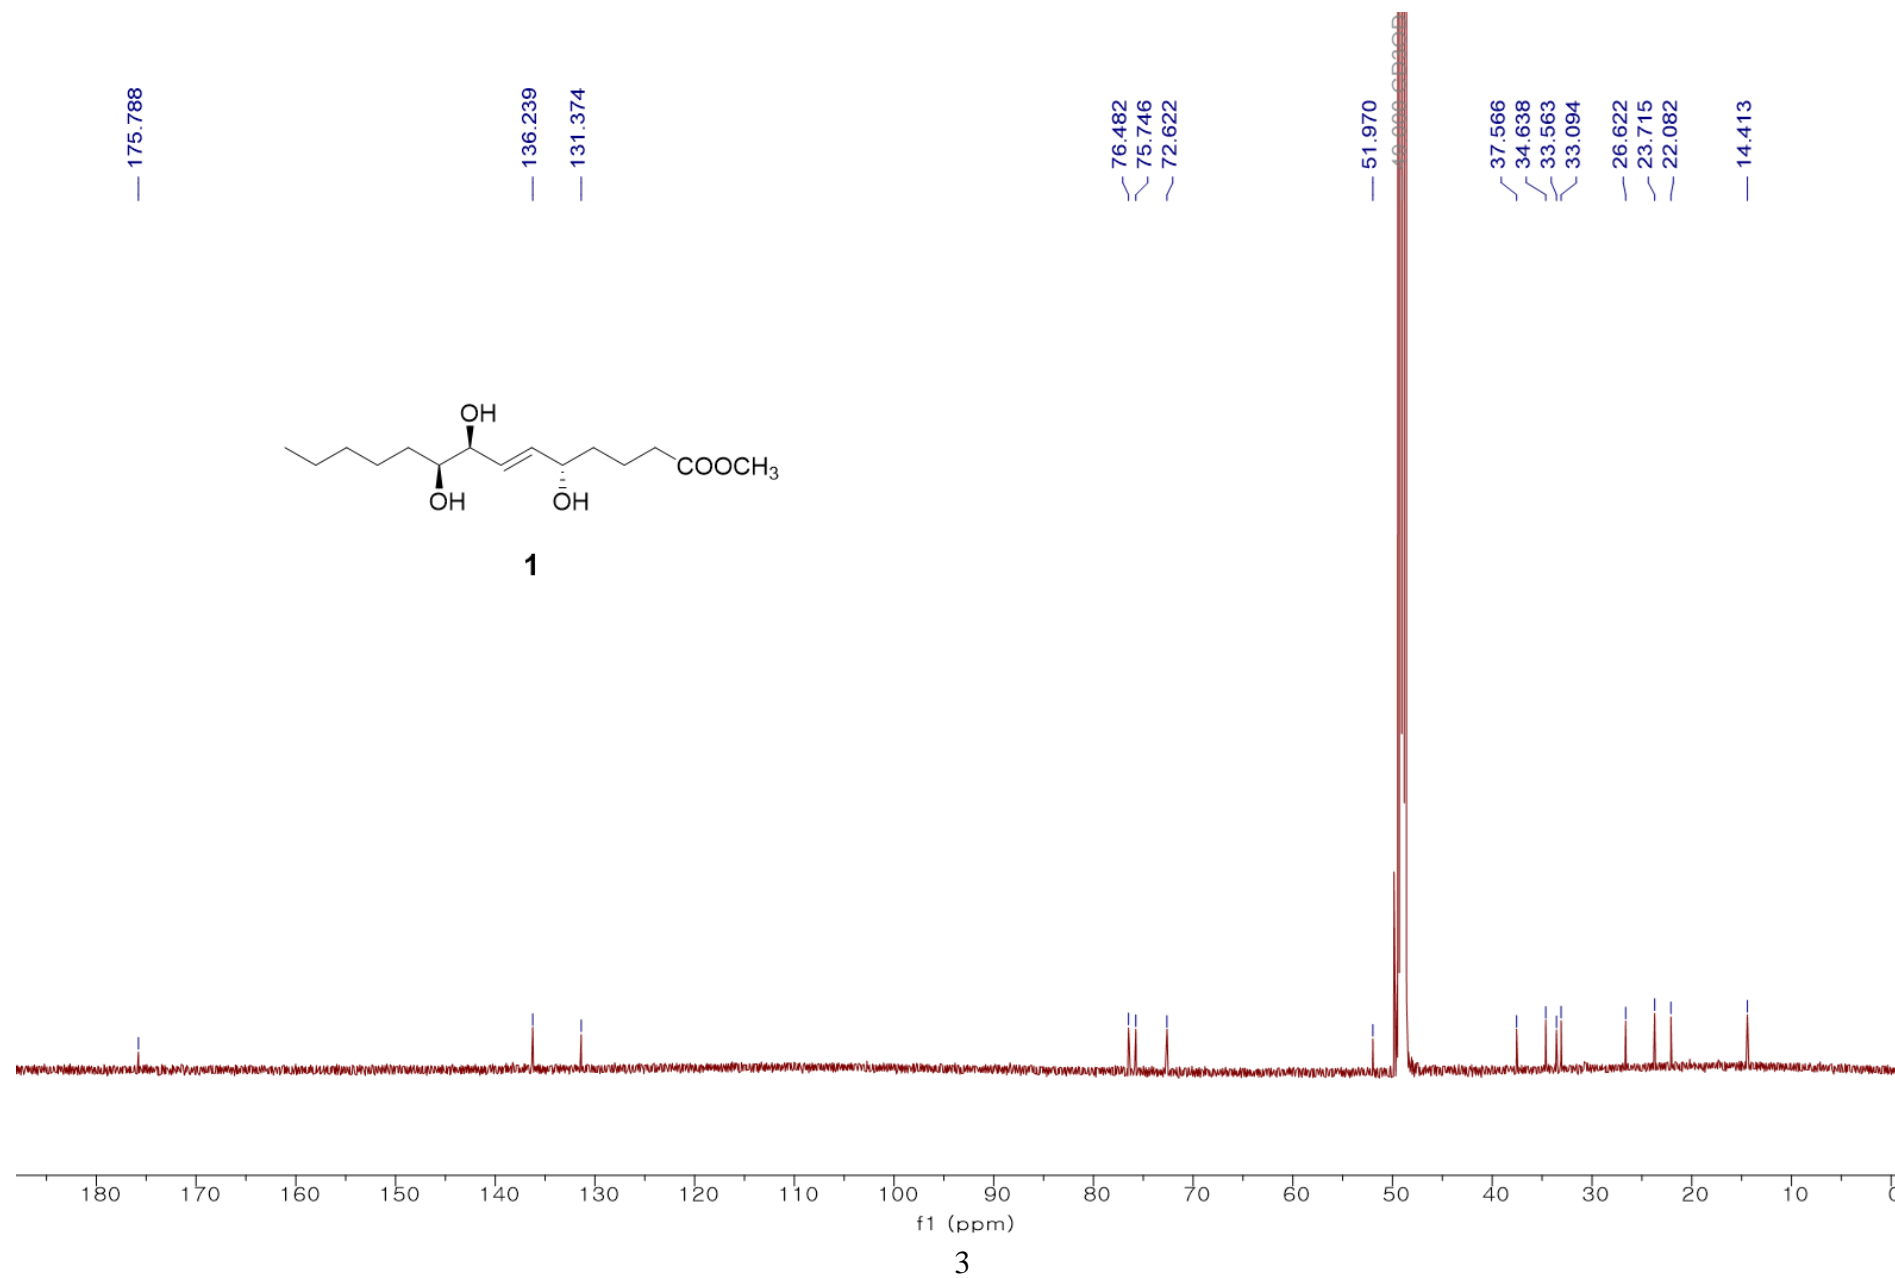

**Figure S4.** COSY spectrum of **1** in methanol-*d*<sub>4</sub>

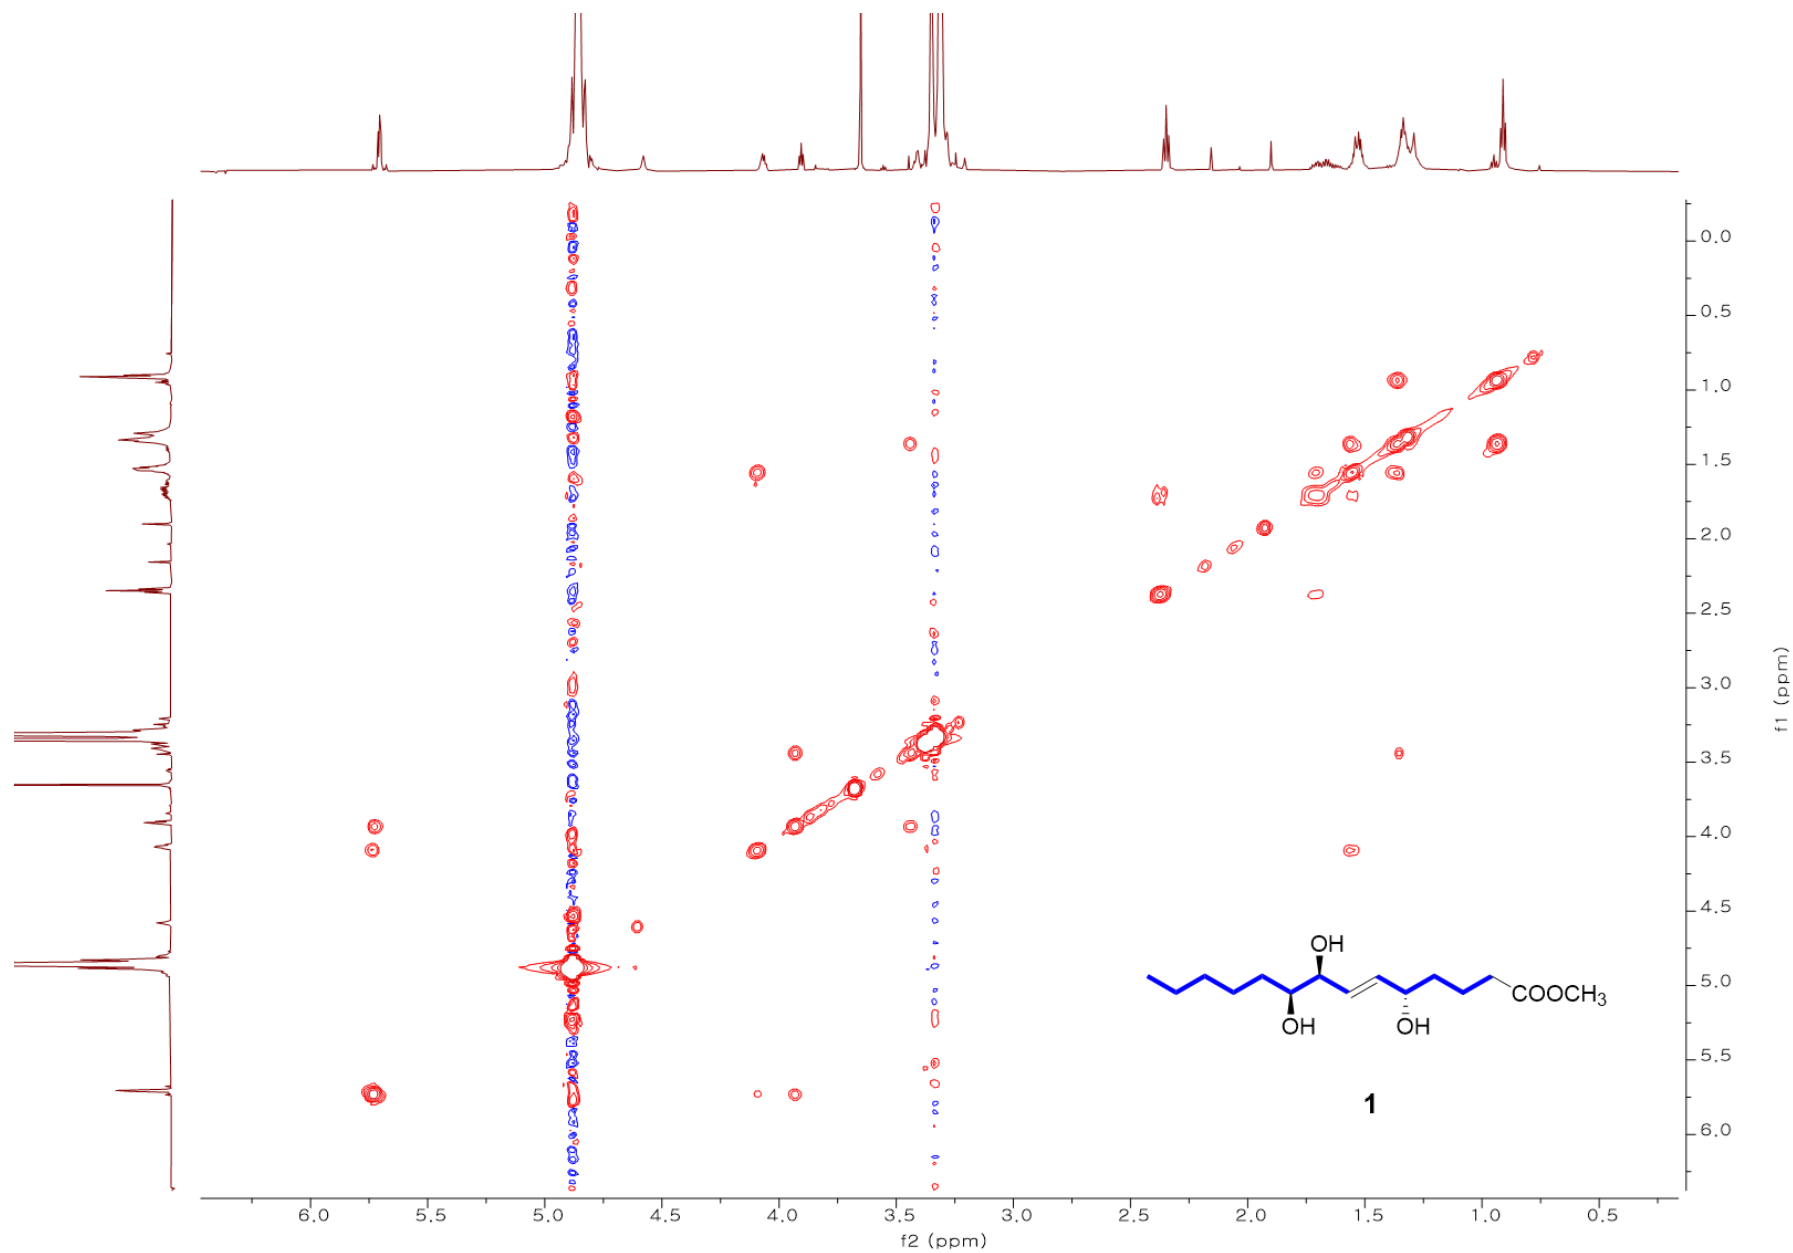

**Figure S5.** HSQC spectrum of **1** in methanol-*d*<sub>4</sub>

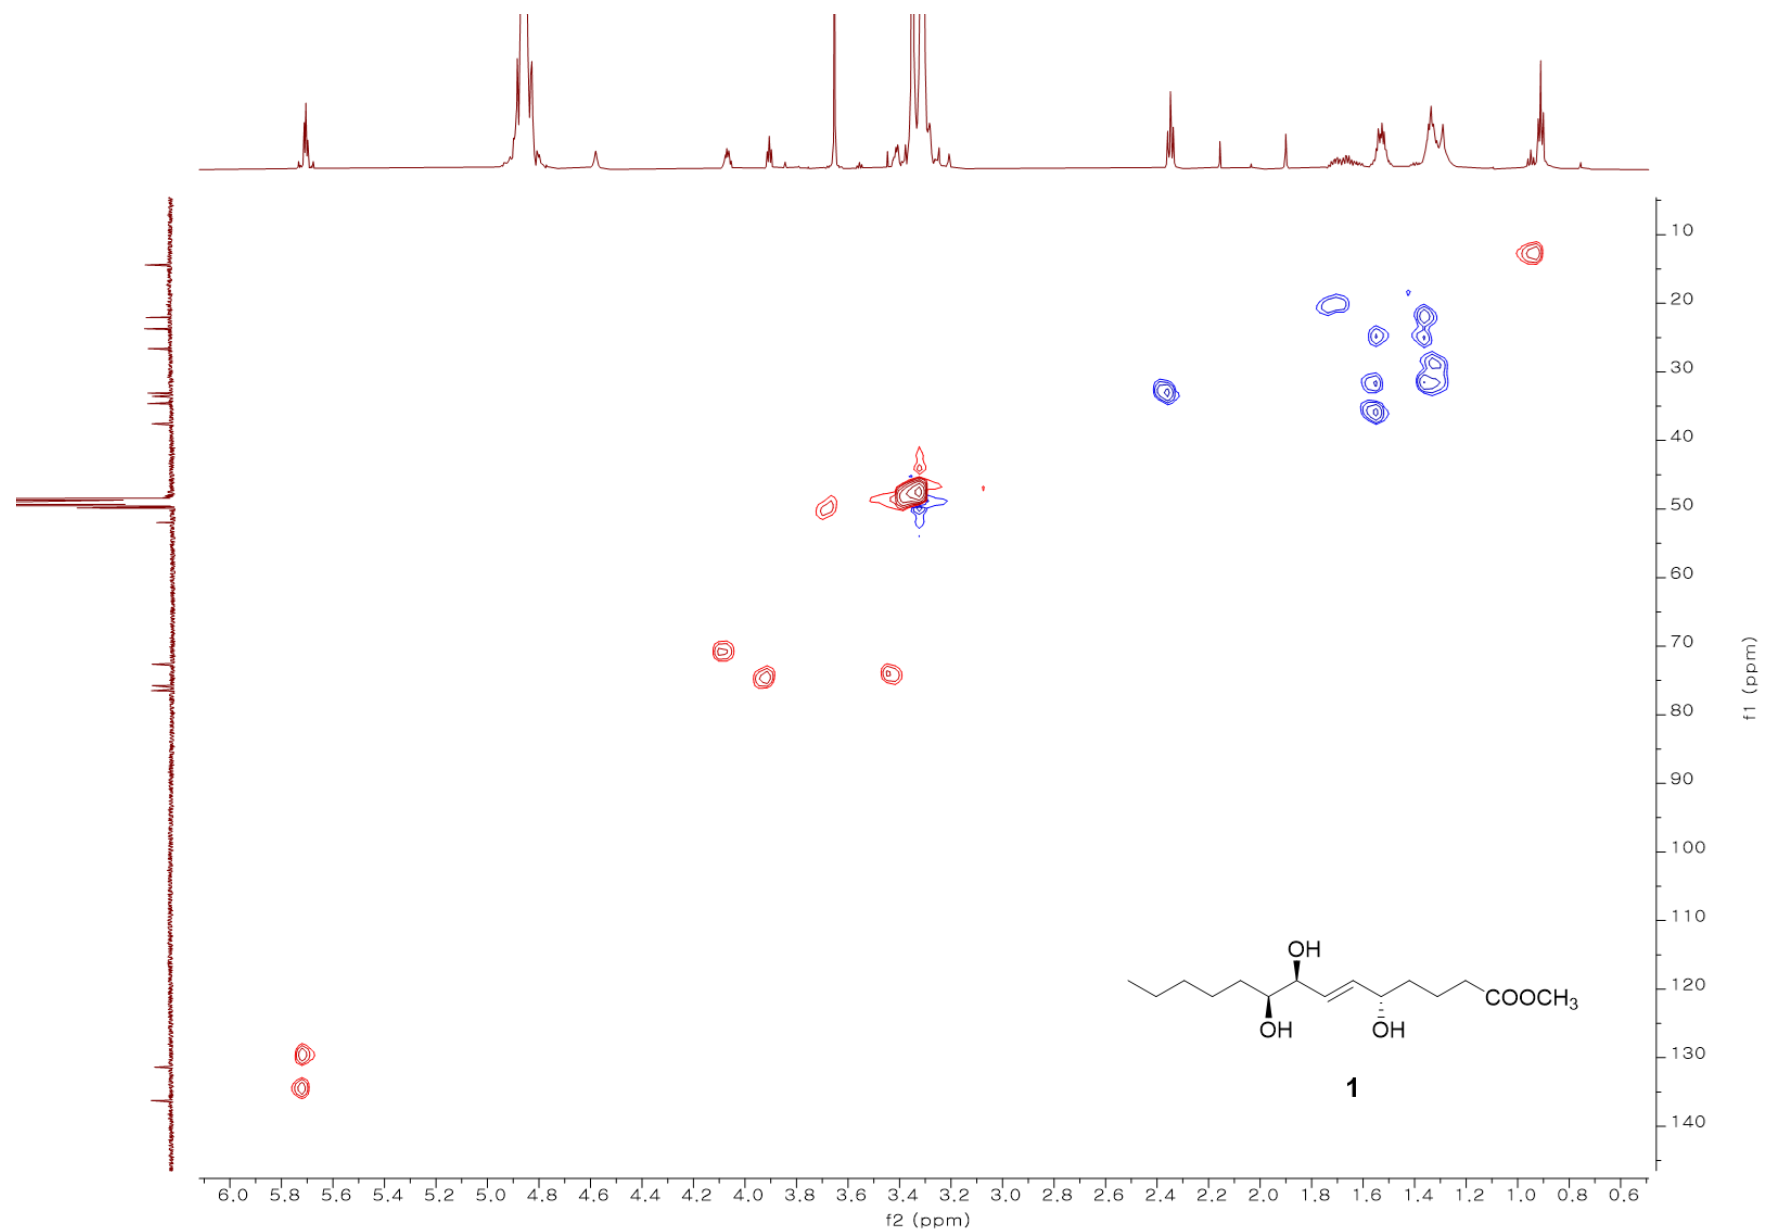

**Figure S6.** HMBC spectrum of **1** in methanol- $d_4$

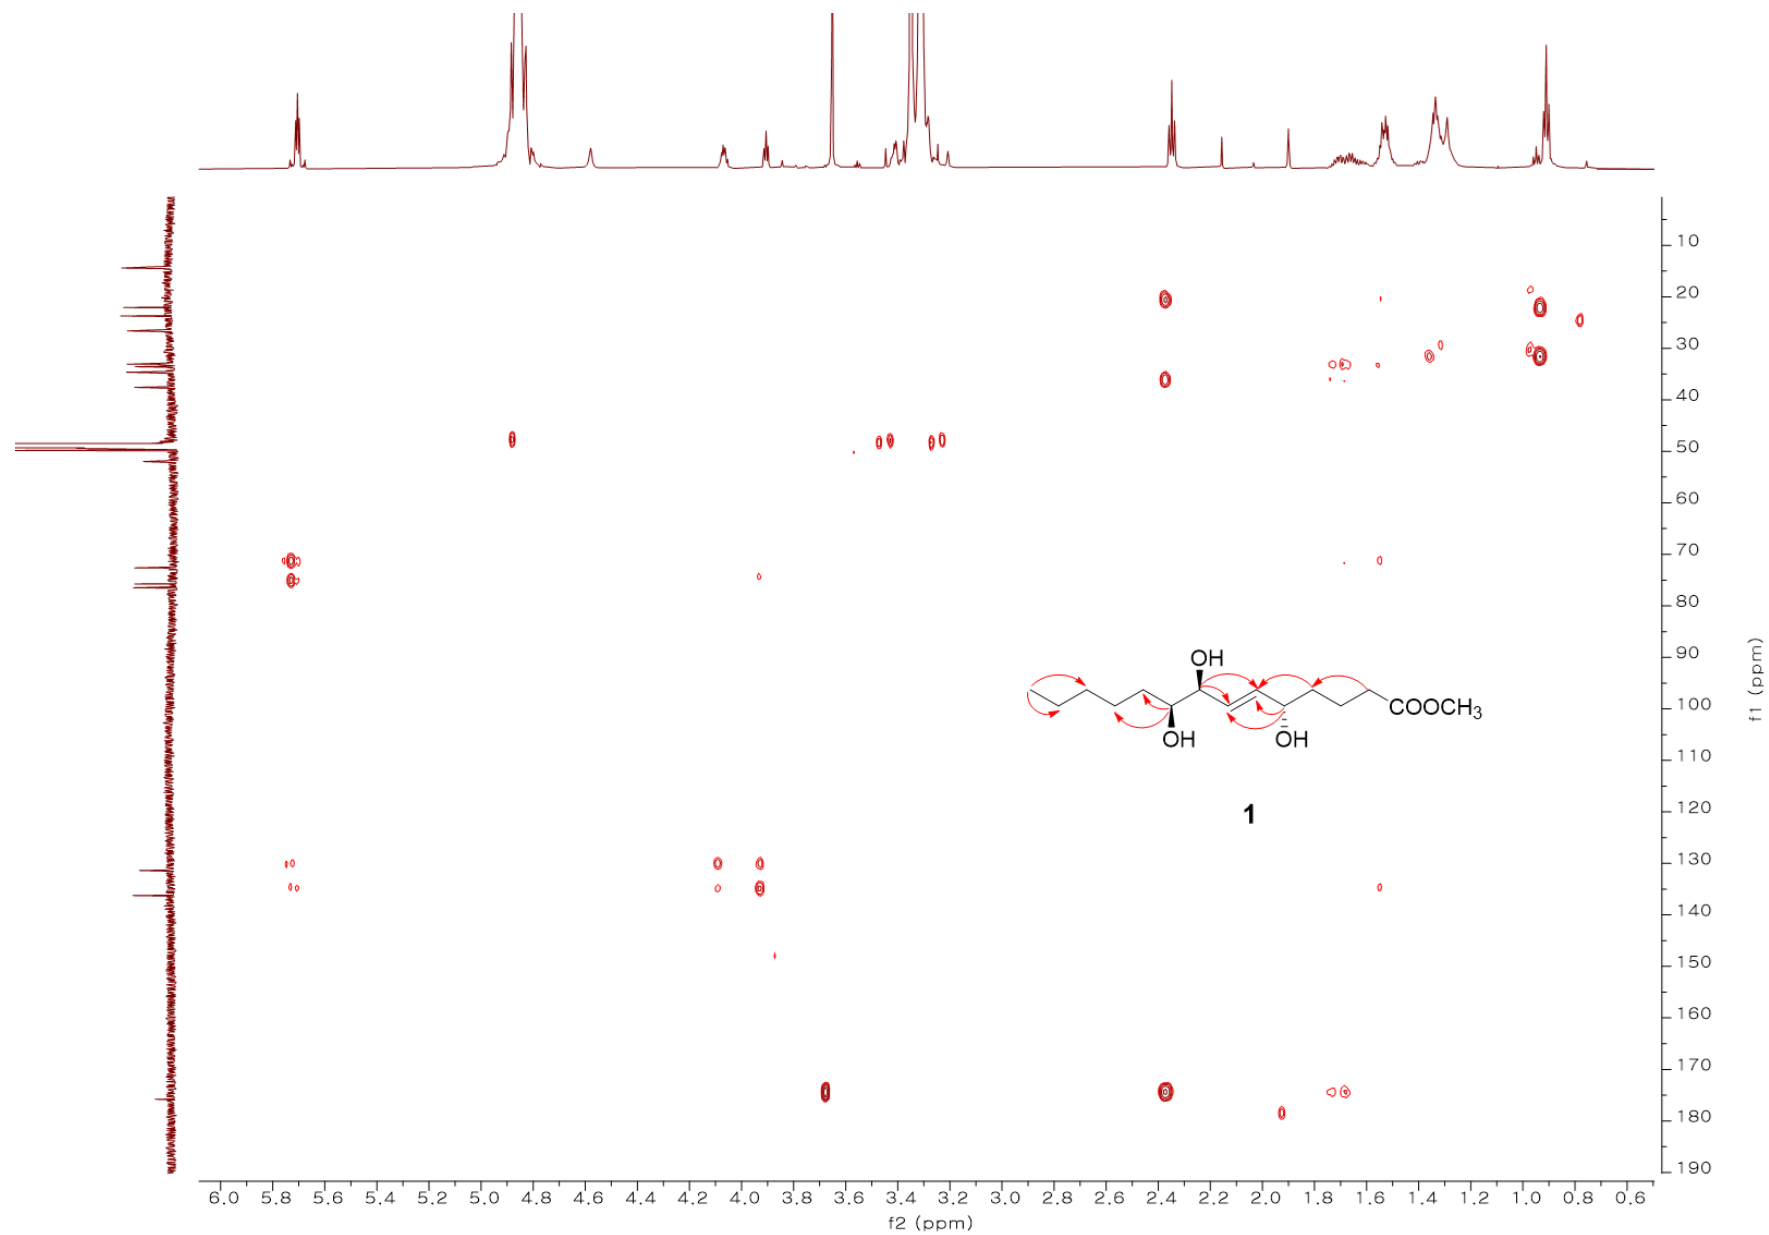



**Figure S7.** HRFABMS spectrum of **2**

140926\_MGBC12\_005-c1 #47-82 RT: 0.83-1.46 AV: 36 NL: 1.52E5  
T: + c FAB Full ms [229.50-380.50]

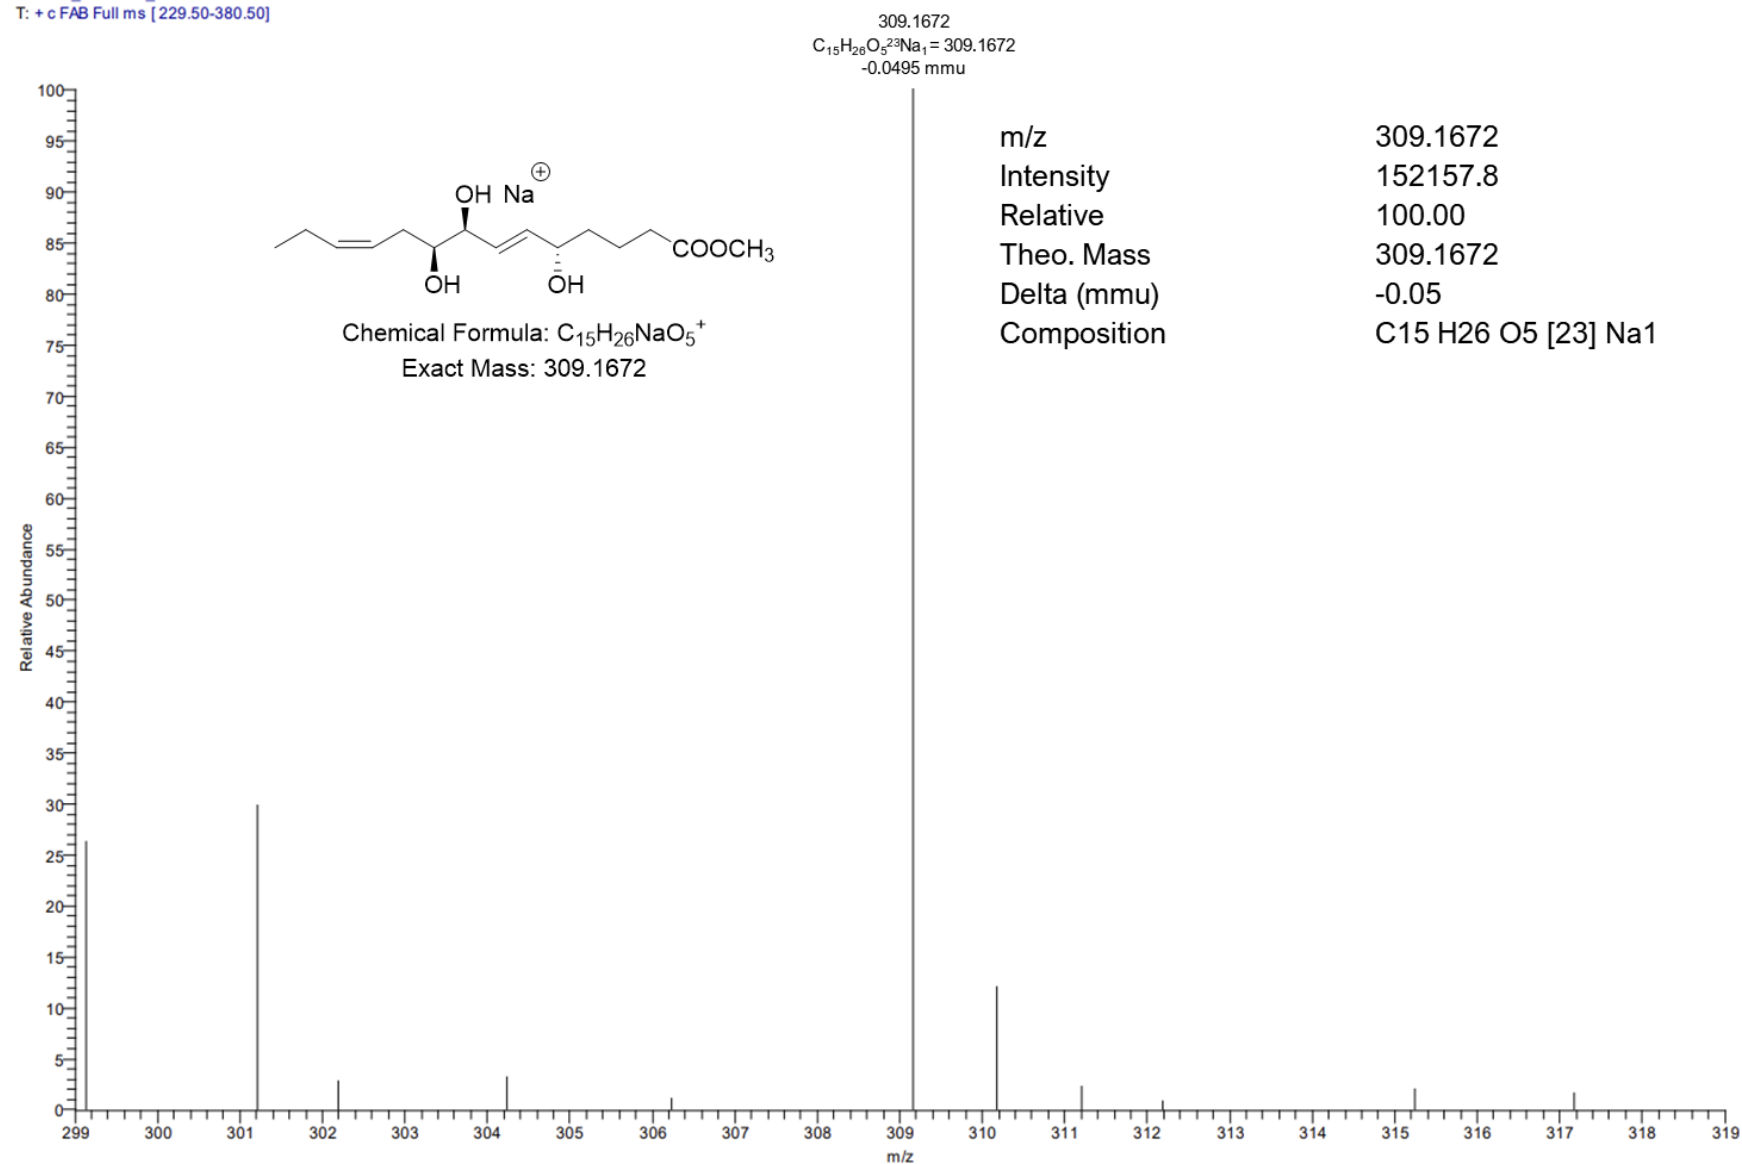

**Figure S8.**  $^1\text{H}$  NMR spectrum of **2** in methanol- $d_4$  (700 MHz)

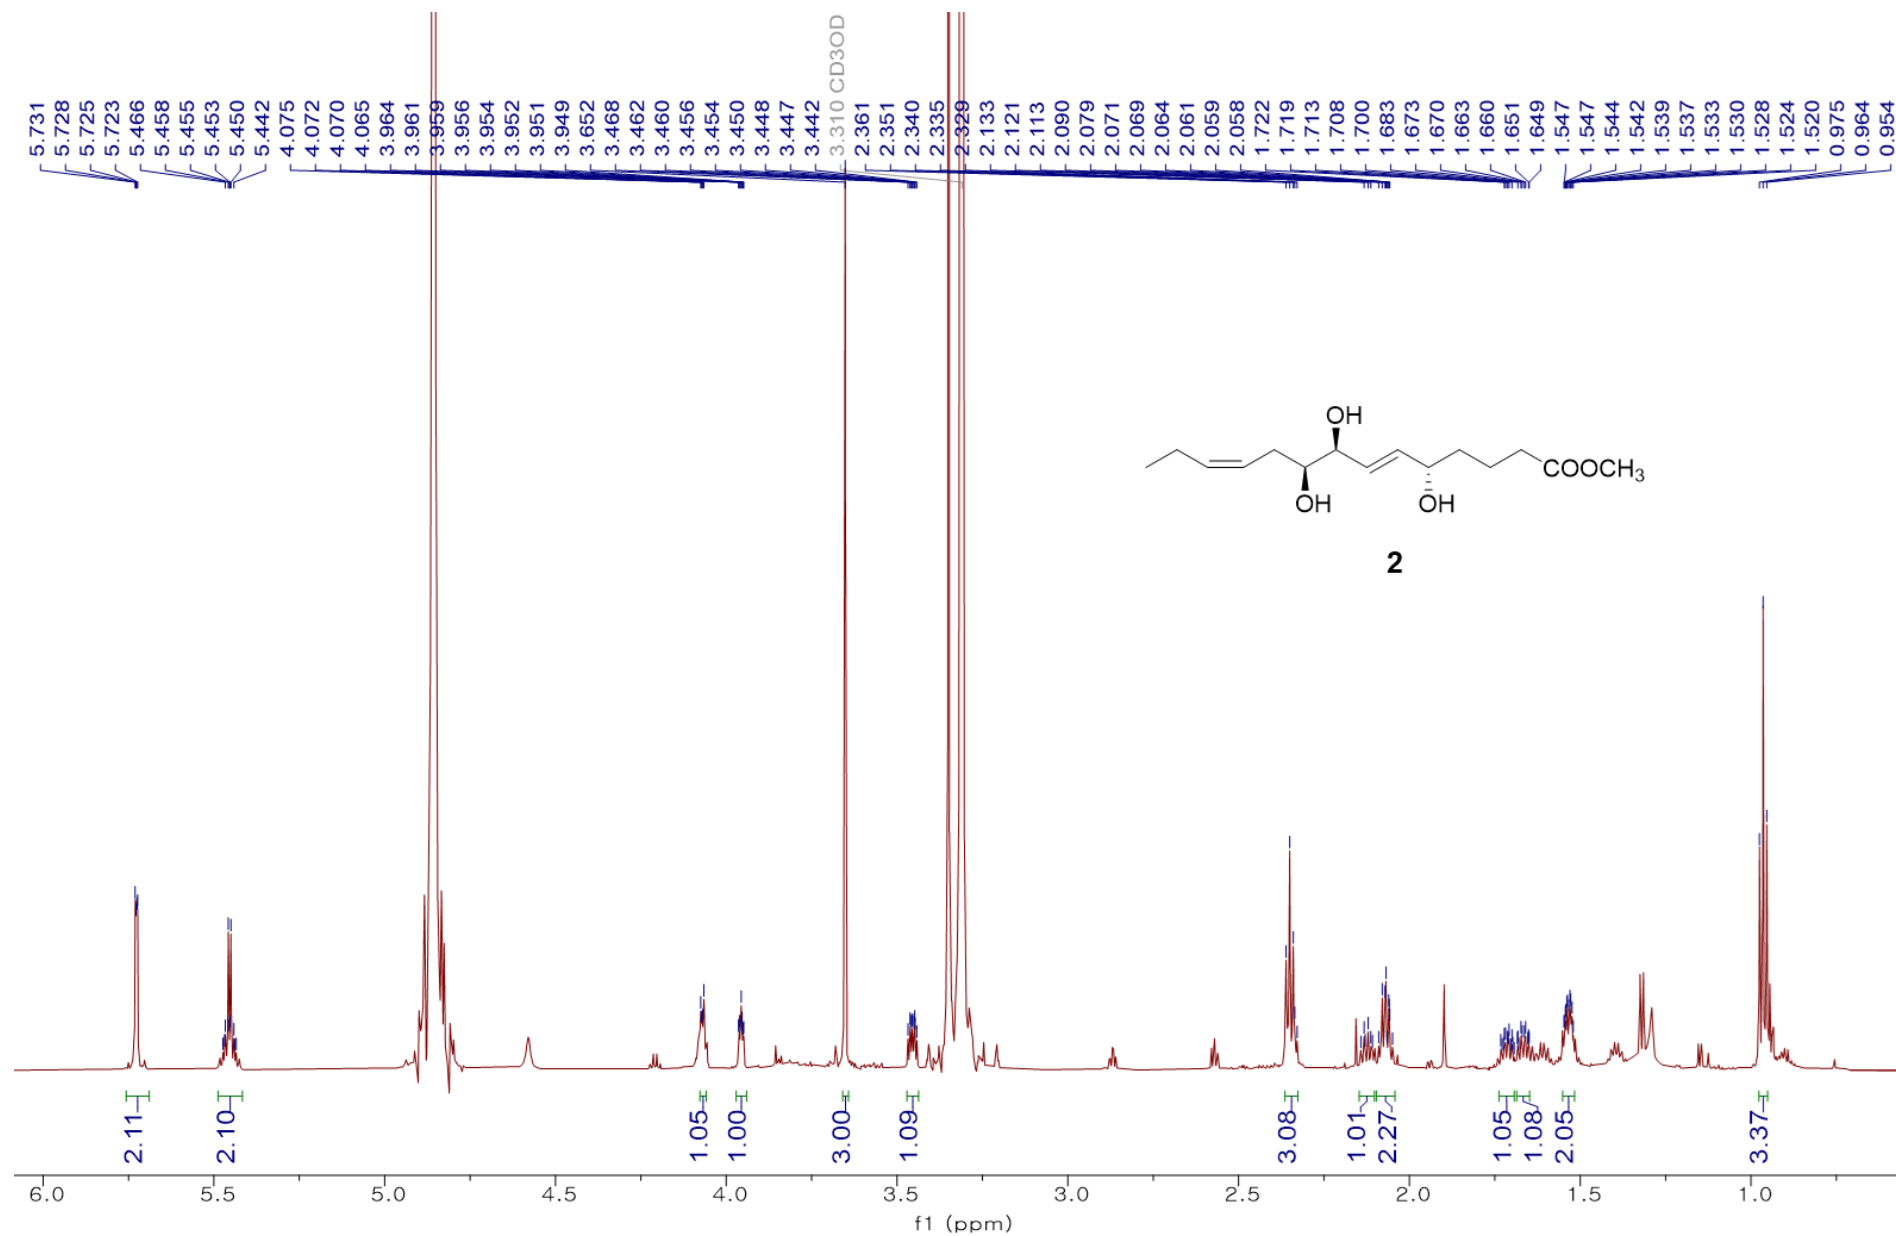

**Figure S9.**  $^{13}\text{C}$  NMR spectrum of **2** in methanol- $d_4$  (175 MHz)

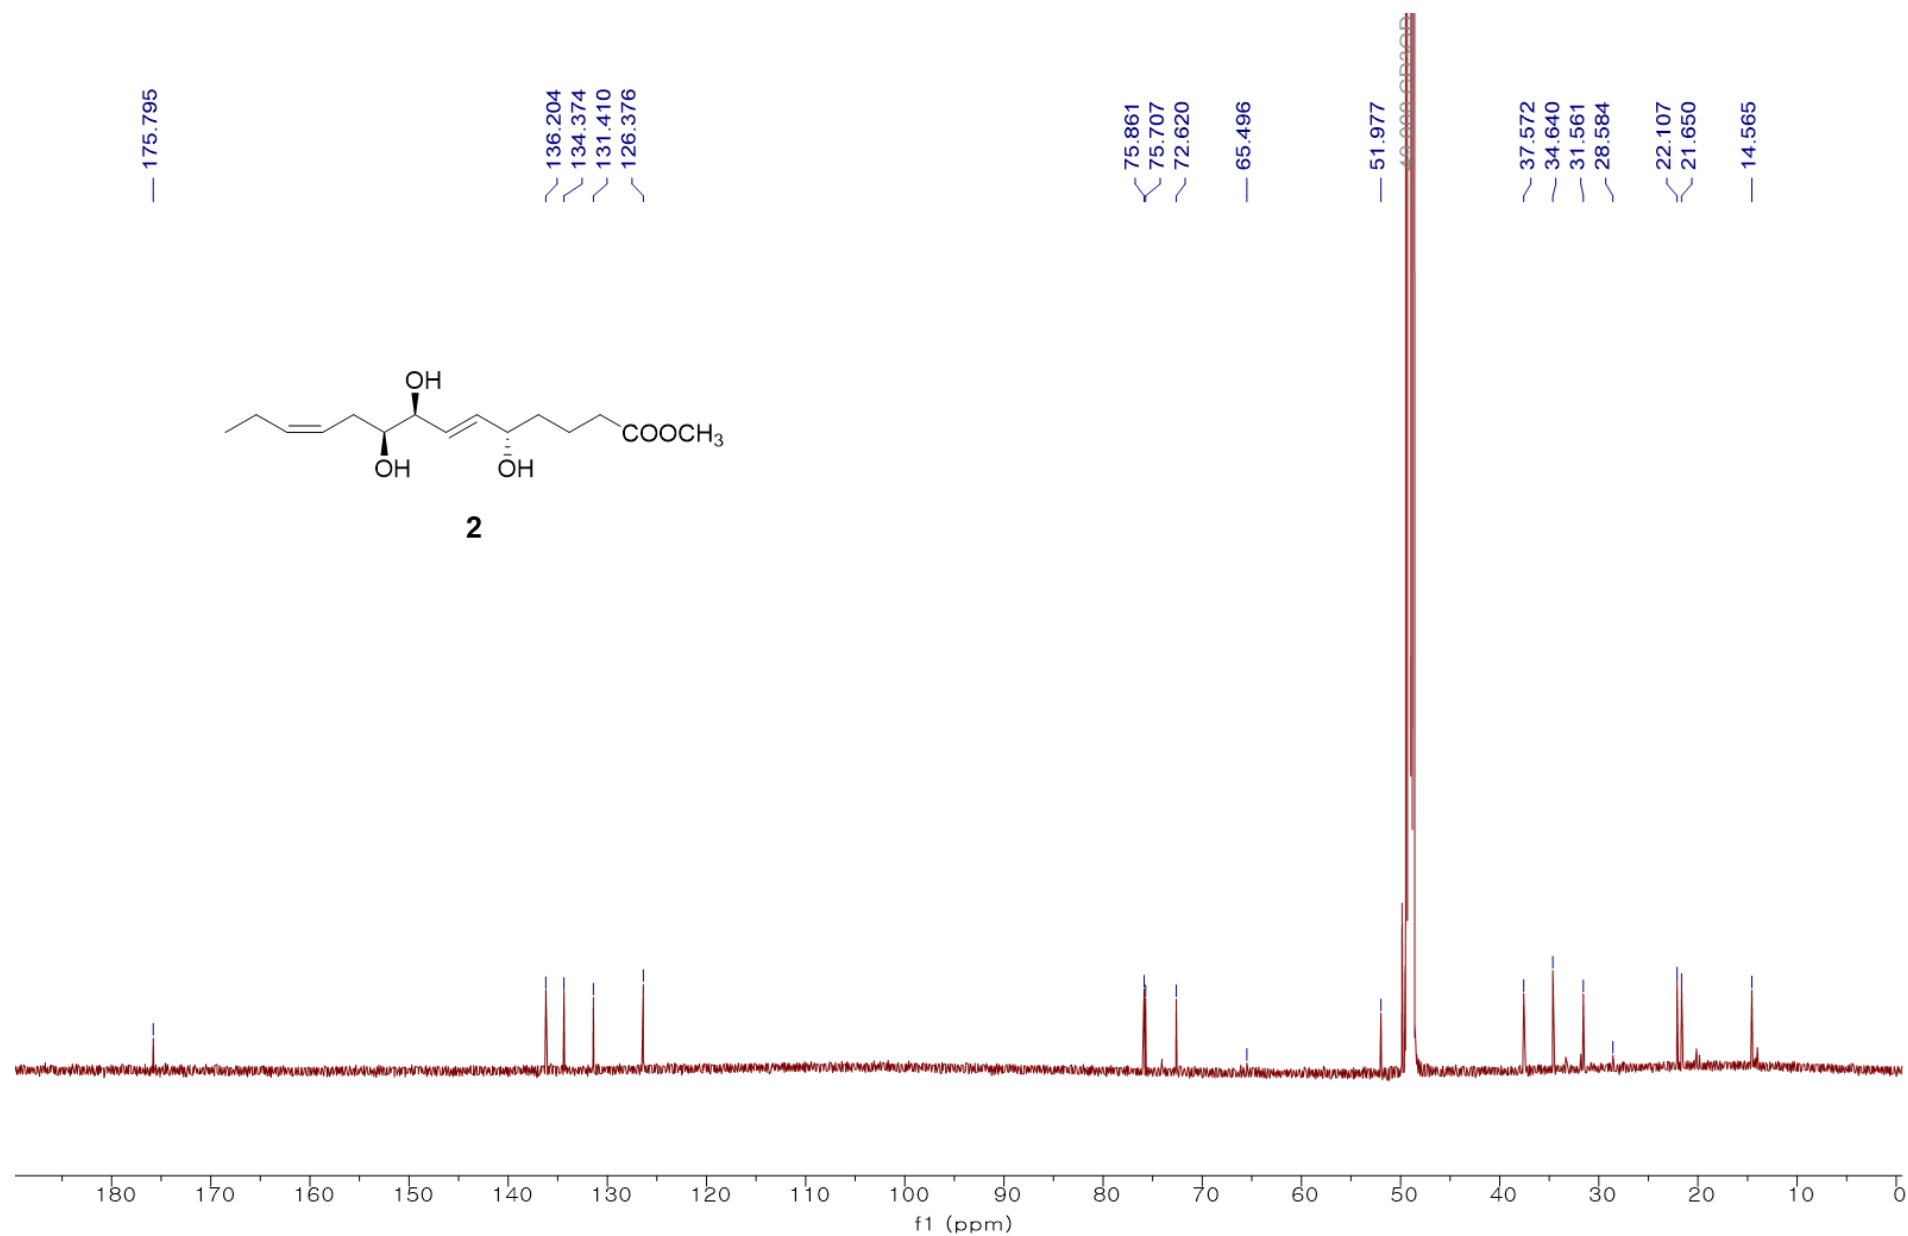

**Figure S10.** COSY spectrum of **2** in methanol-*d*<sub>4</sub>

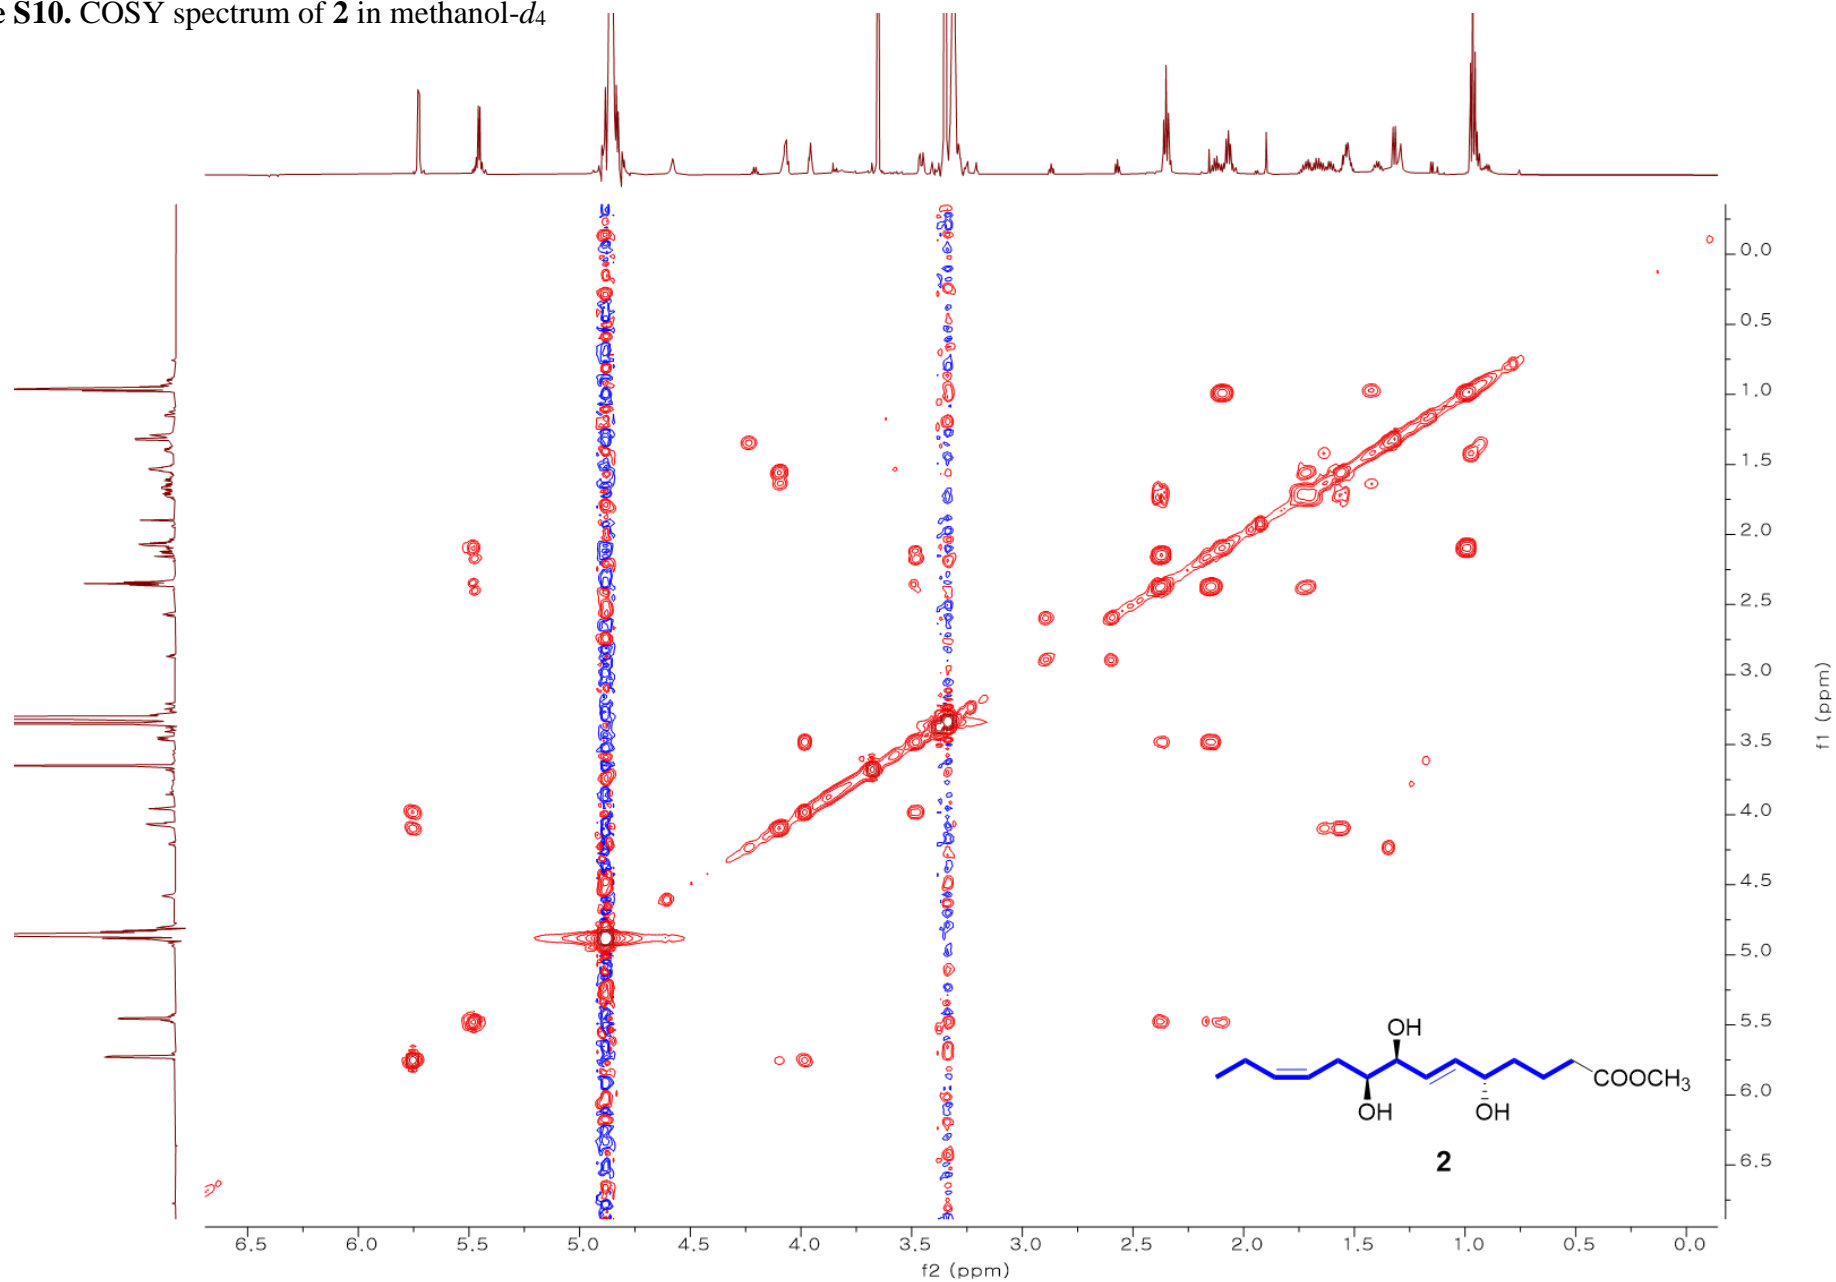

**Figure S11.** HSQC spectrum of **2** in methanol-*d*<sub>4</sub>

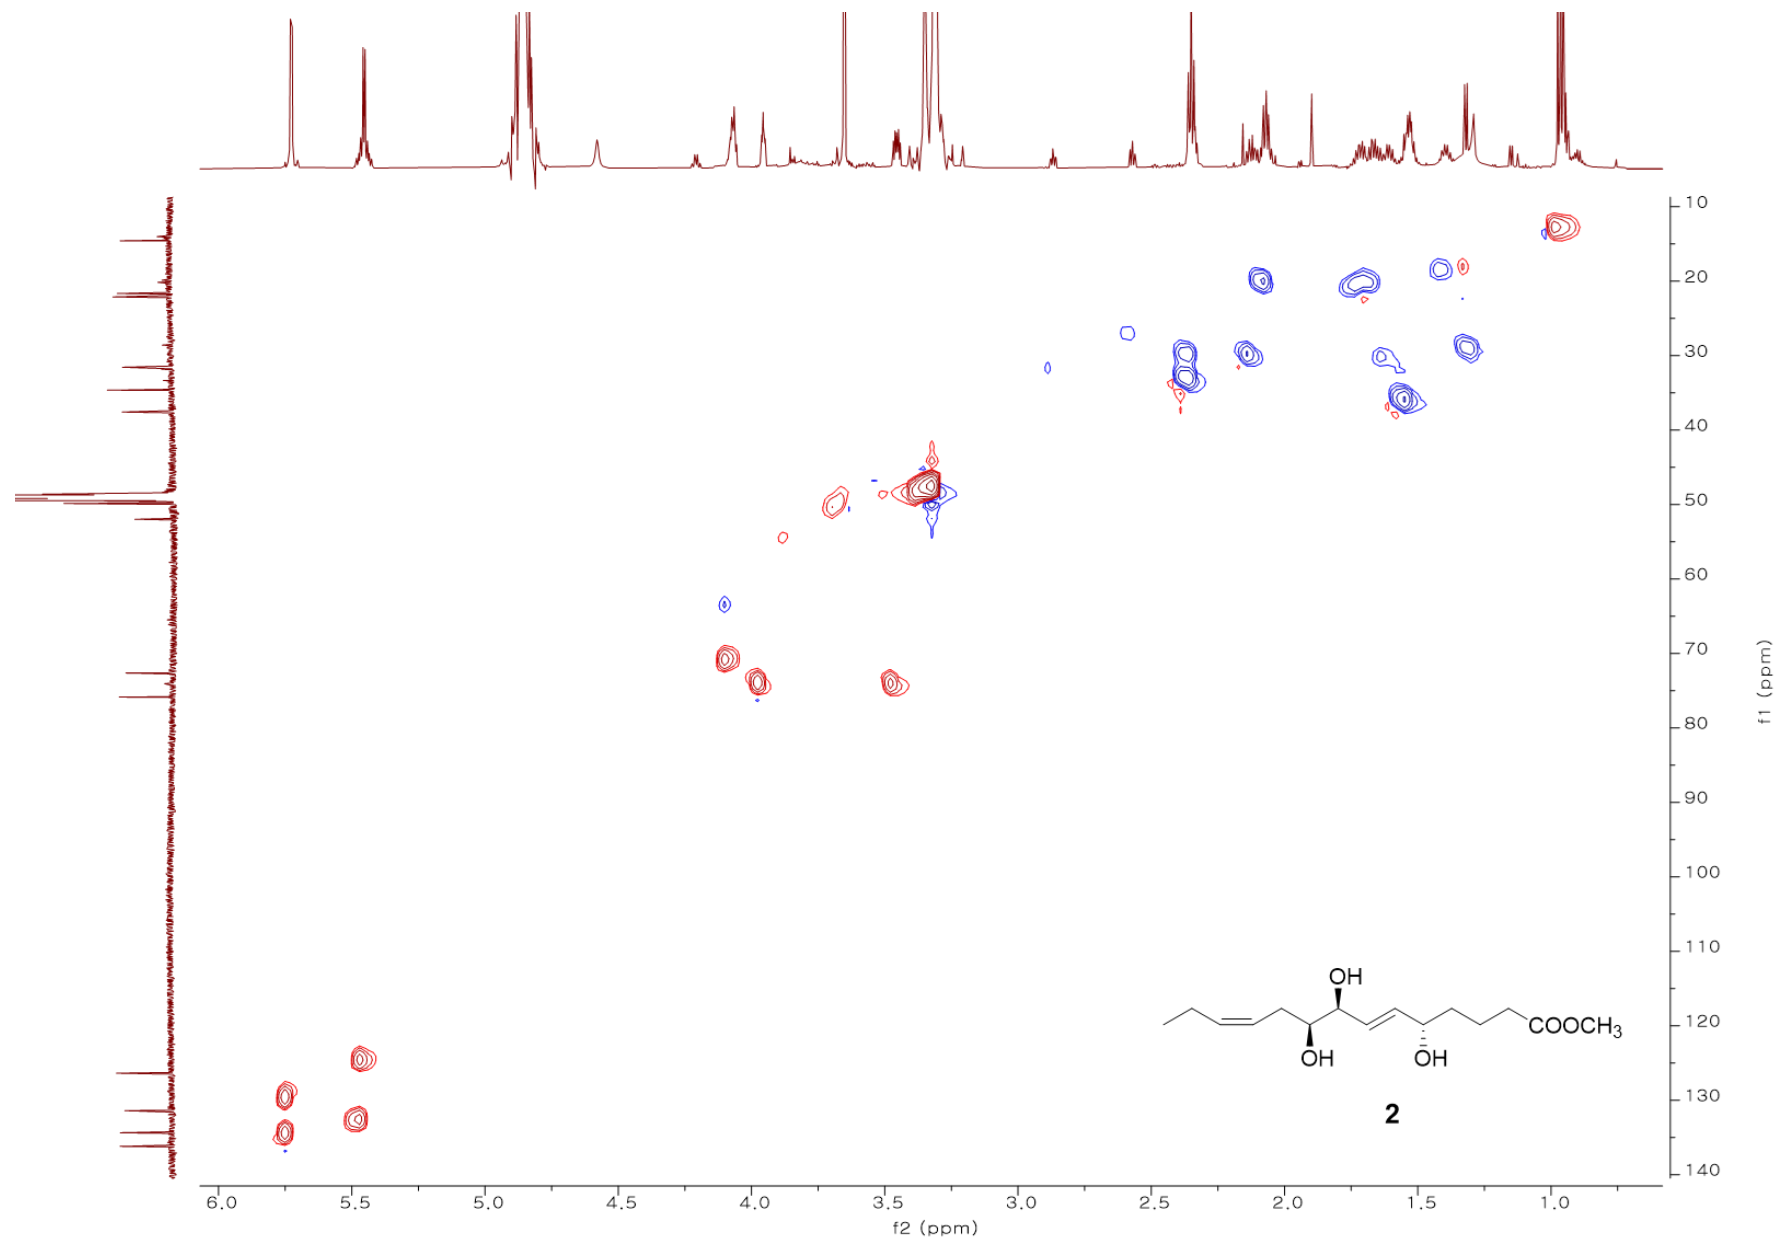

**Figure S12.** HMBC spectrum of **2** in methanol- $d_4$

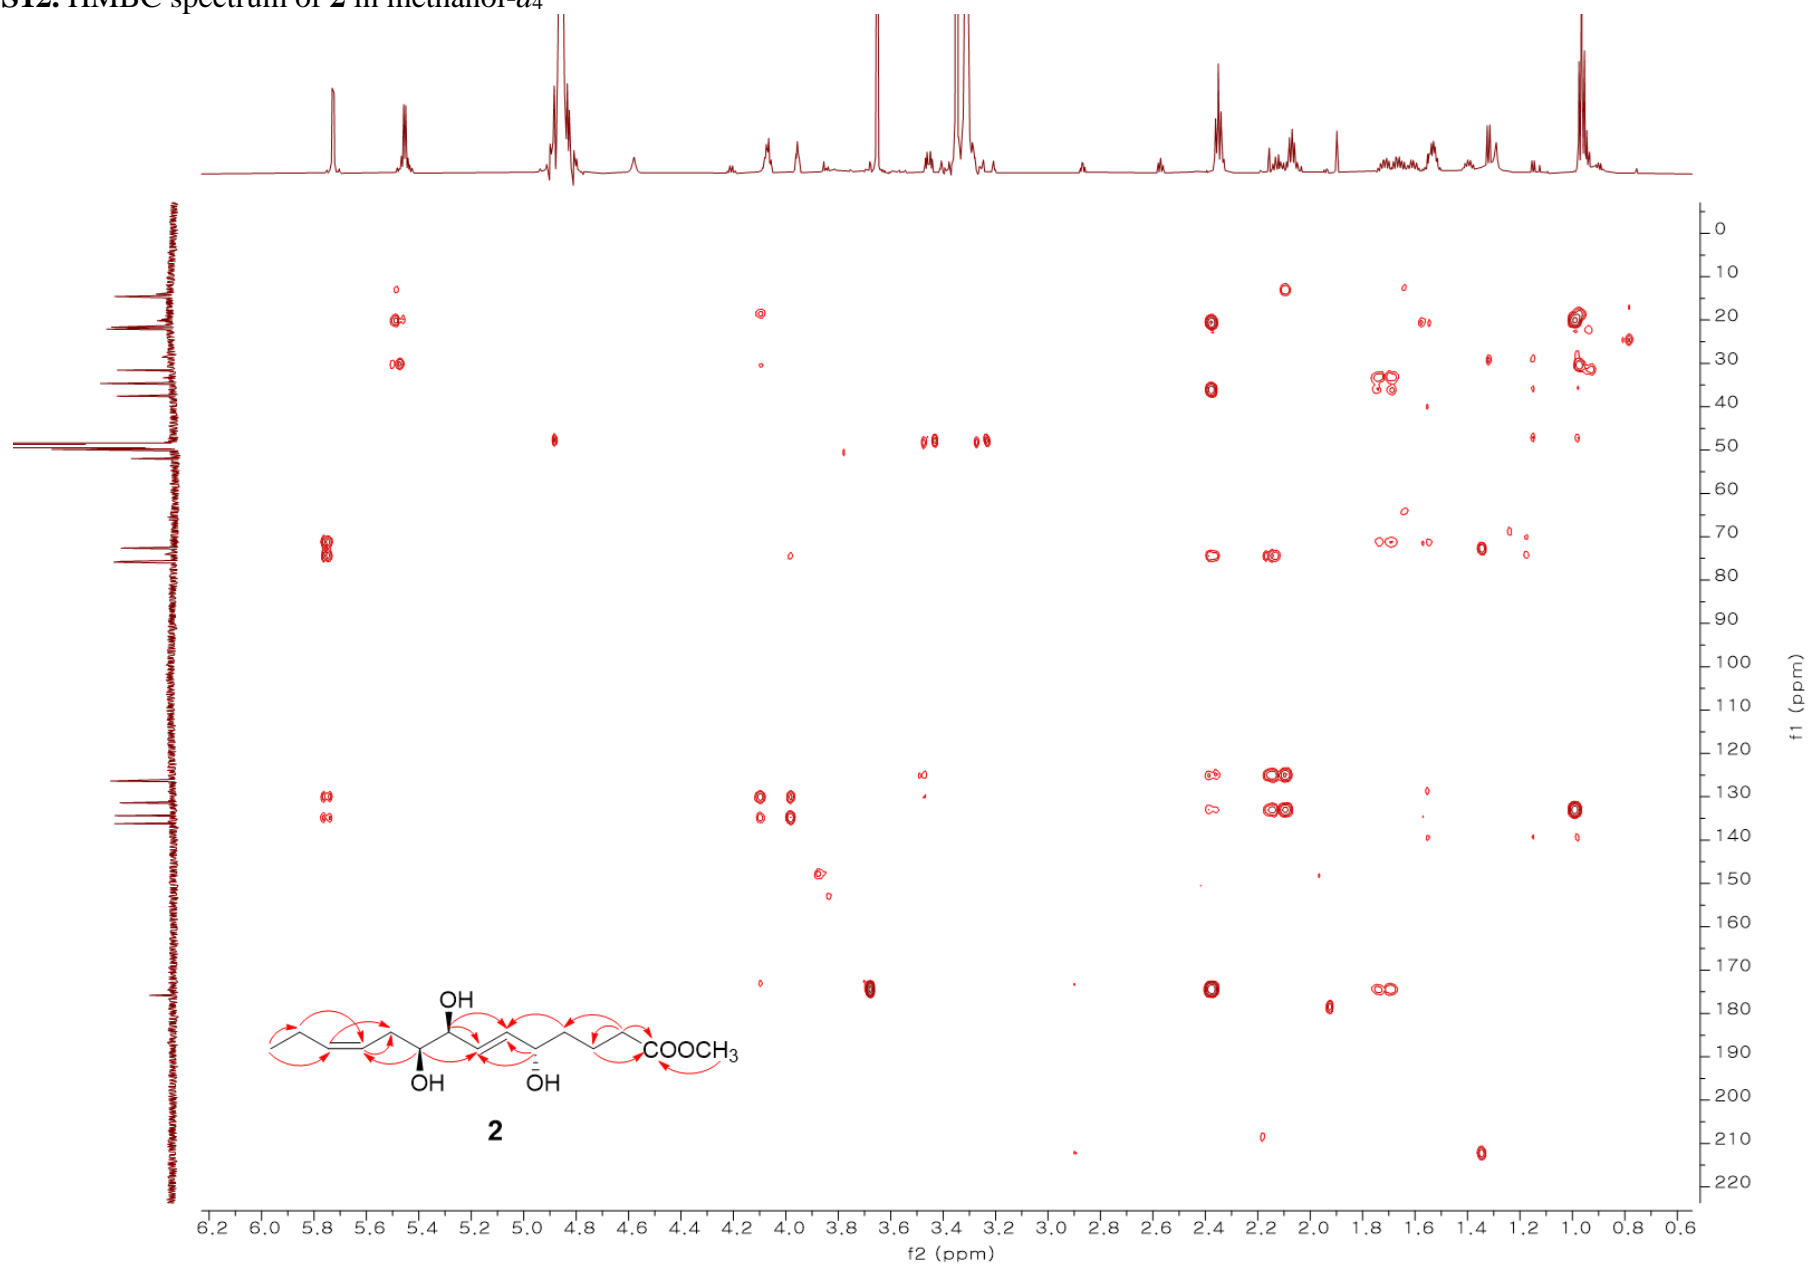

**Figure S13.** HRFABMS spectrum of **3**

140709\_MGCC19\_001-c1 #7-45 RT: 0.11-0.77 AV: 39 NL: 1.33E5  
T: + c FAB Full ms [319.50-470.50]

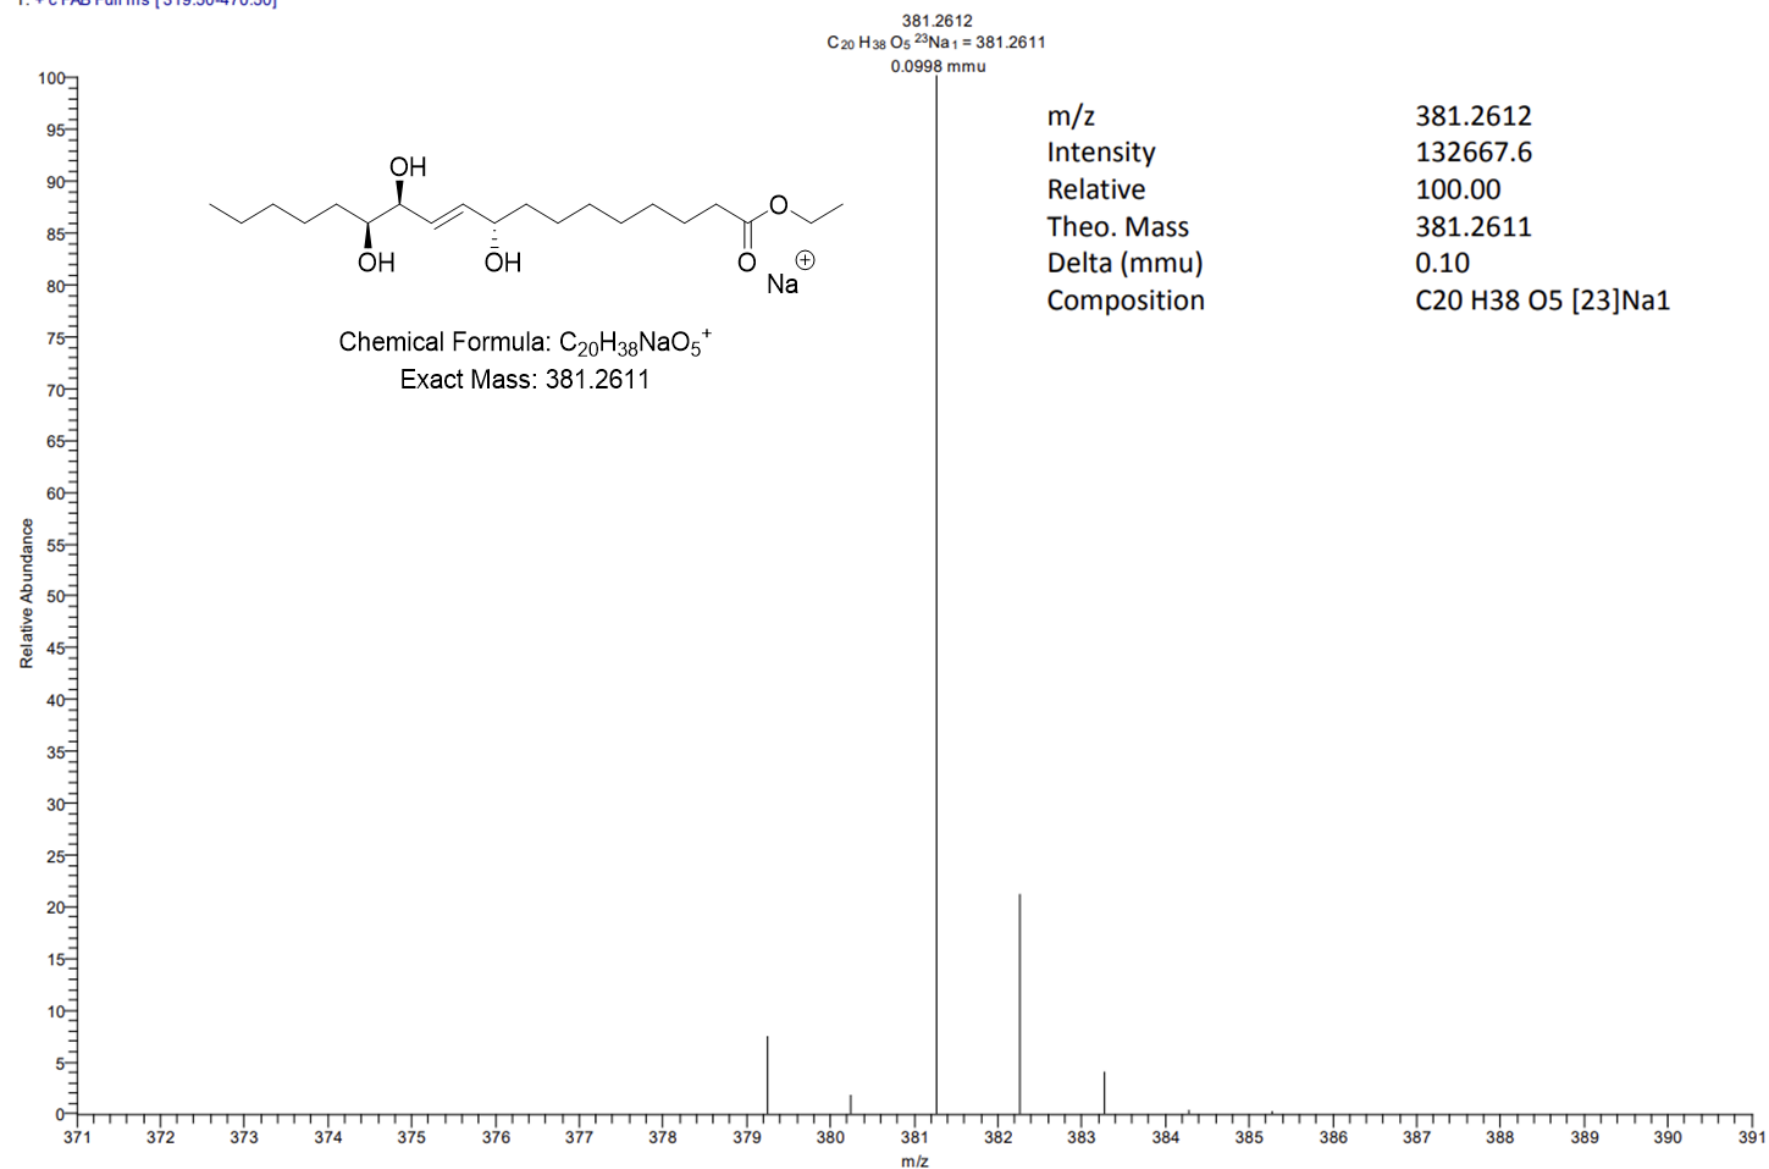

**Figure S14.**  $^1\text{H}$  NMR spectrum of **3** in chloroform- $d$  (700 MHz)

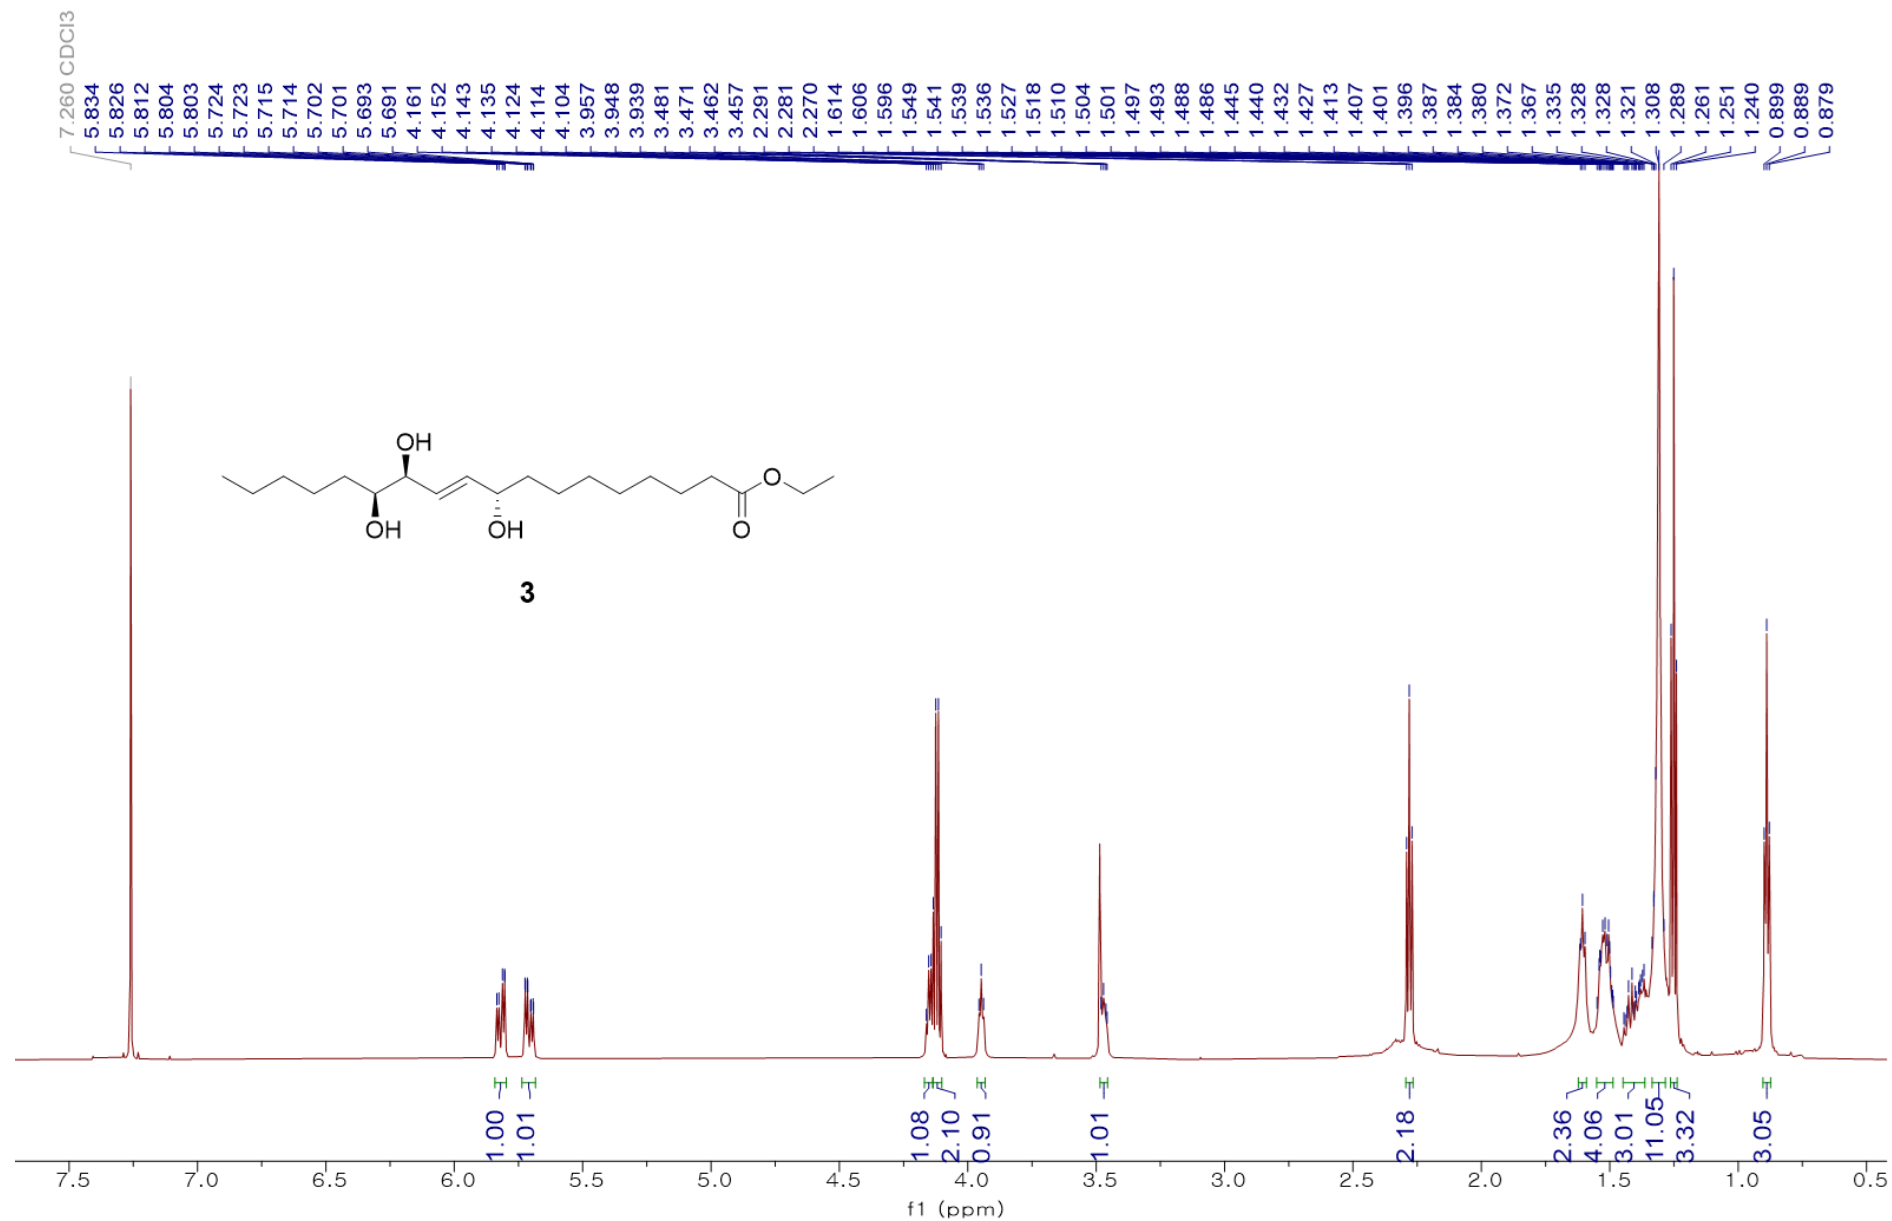



**Figure S15.**  $^{13}\text{C}$  NMR spectrum of **3** in chloroform- $d$  (175 MHz)

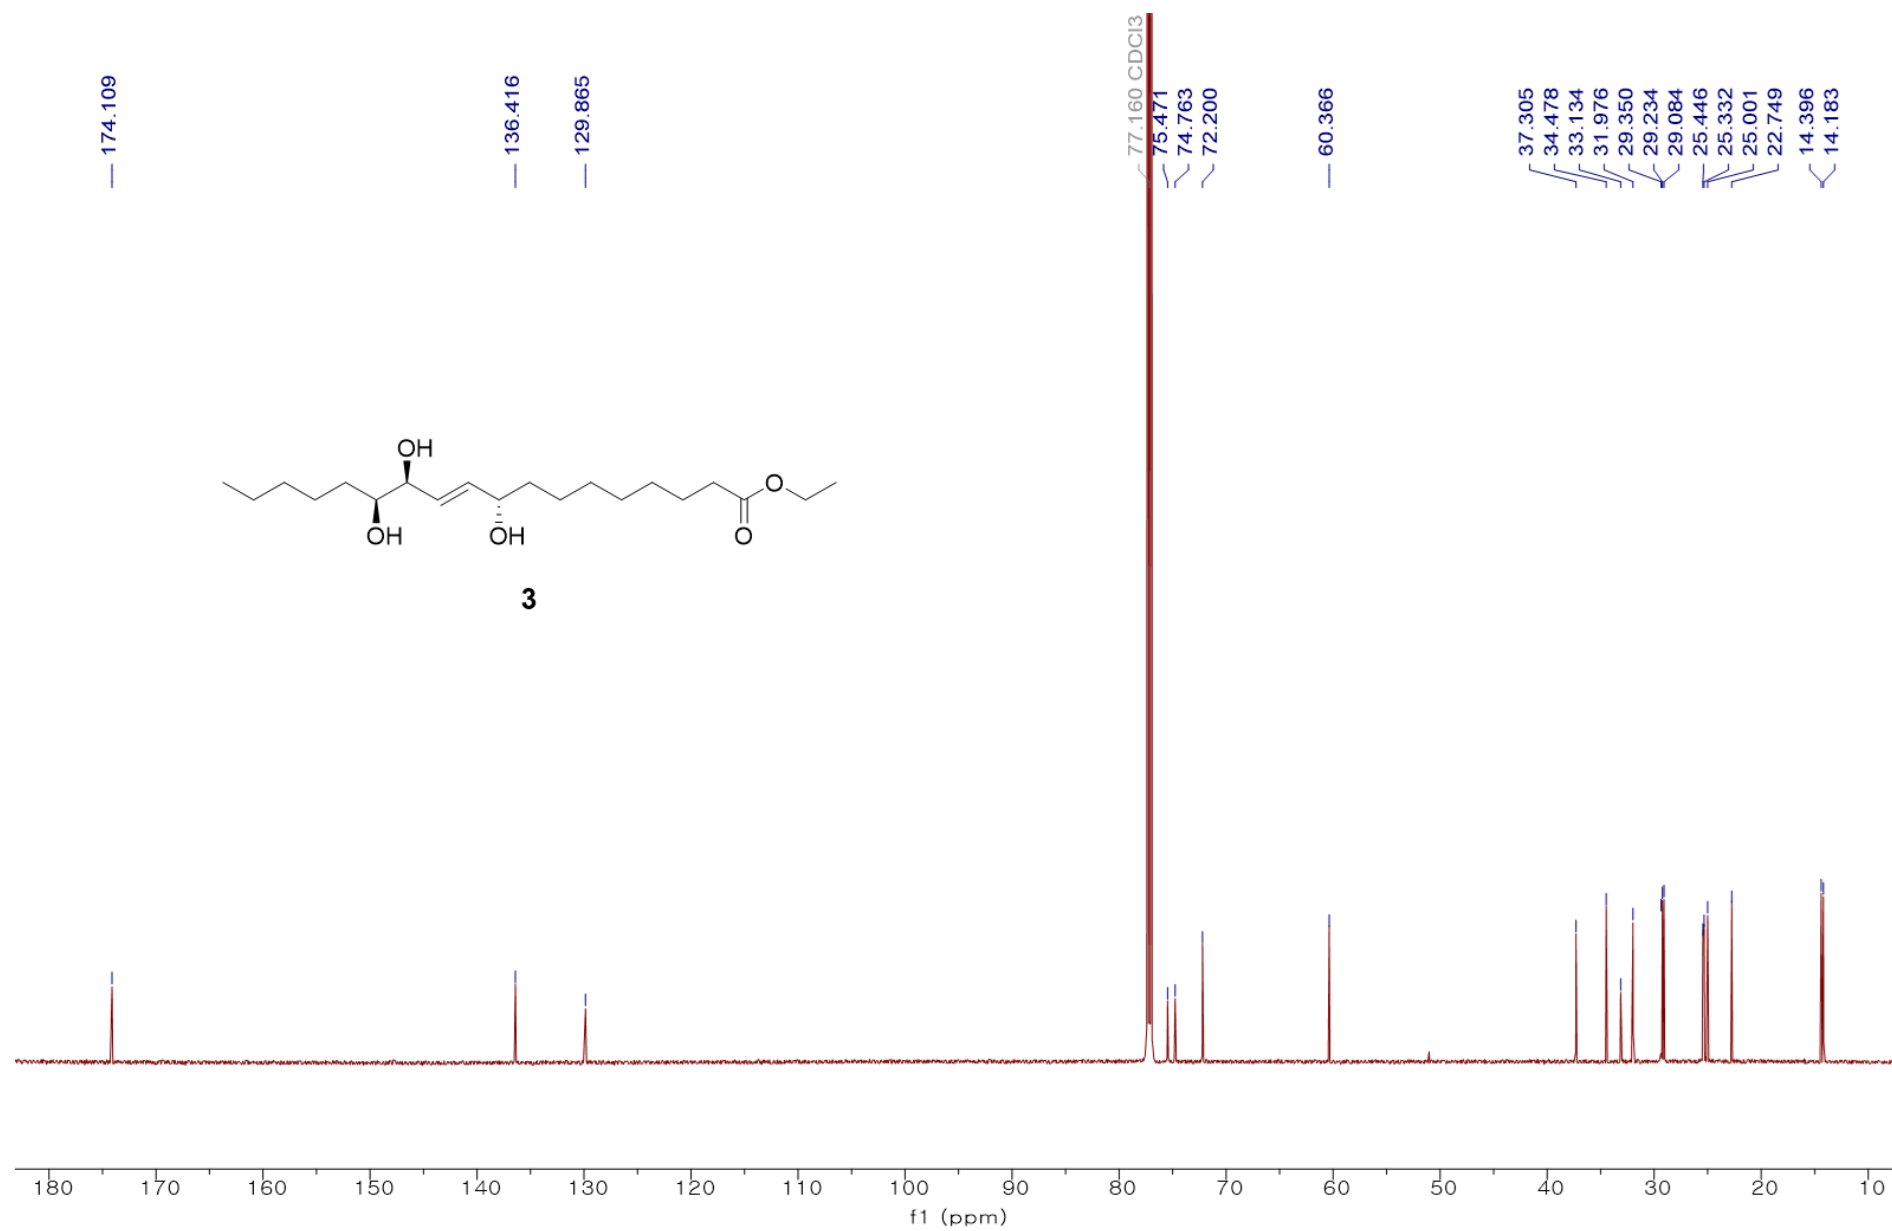

**Figure S16.** COSY spectrum of **3** in chloroform-*d*

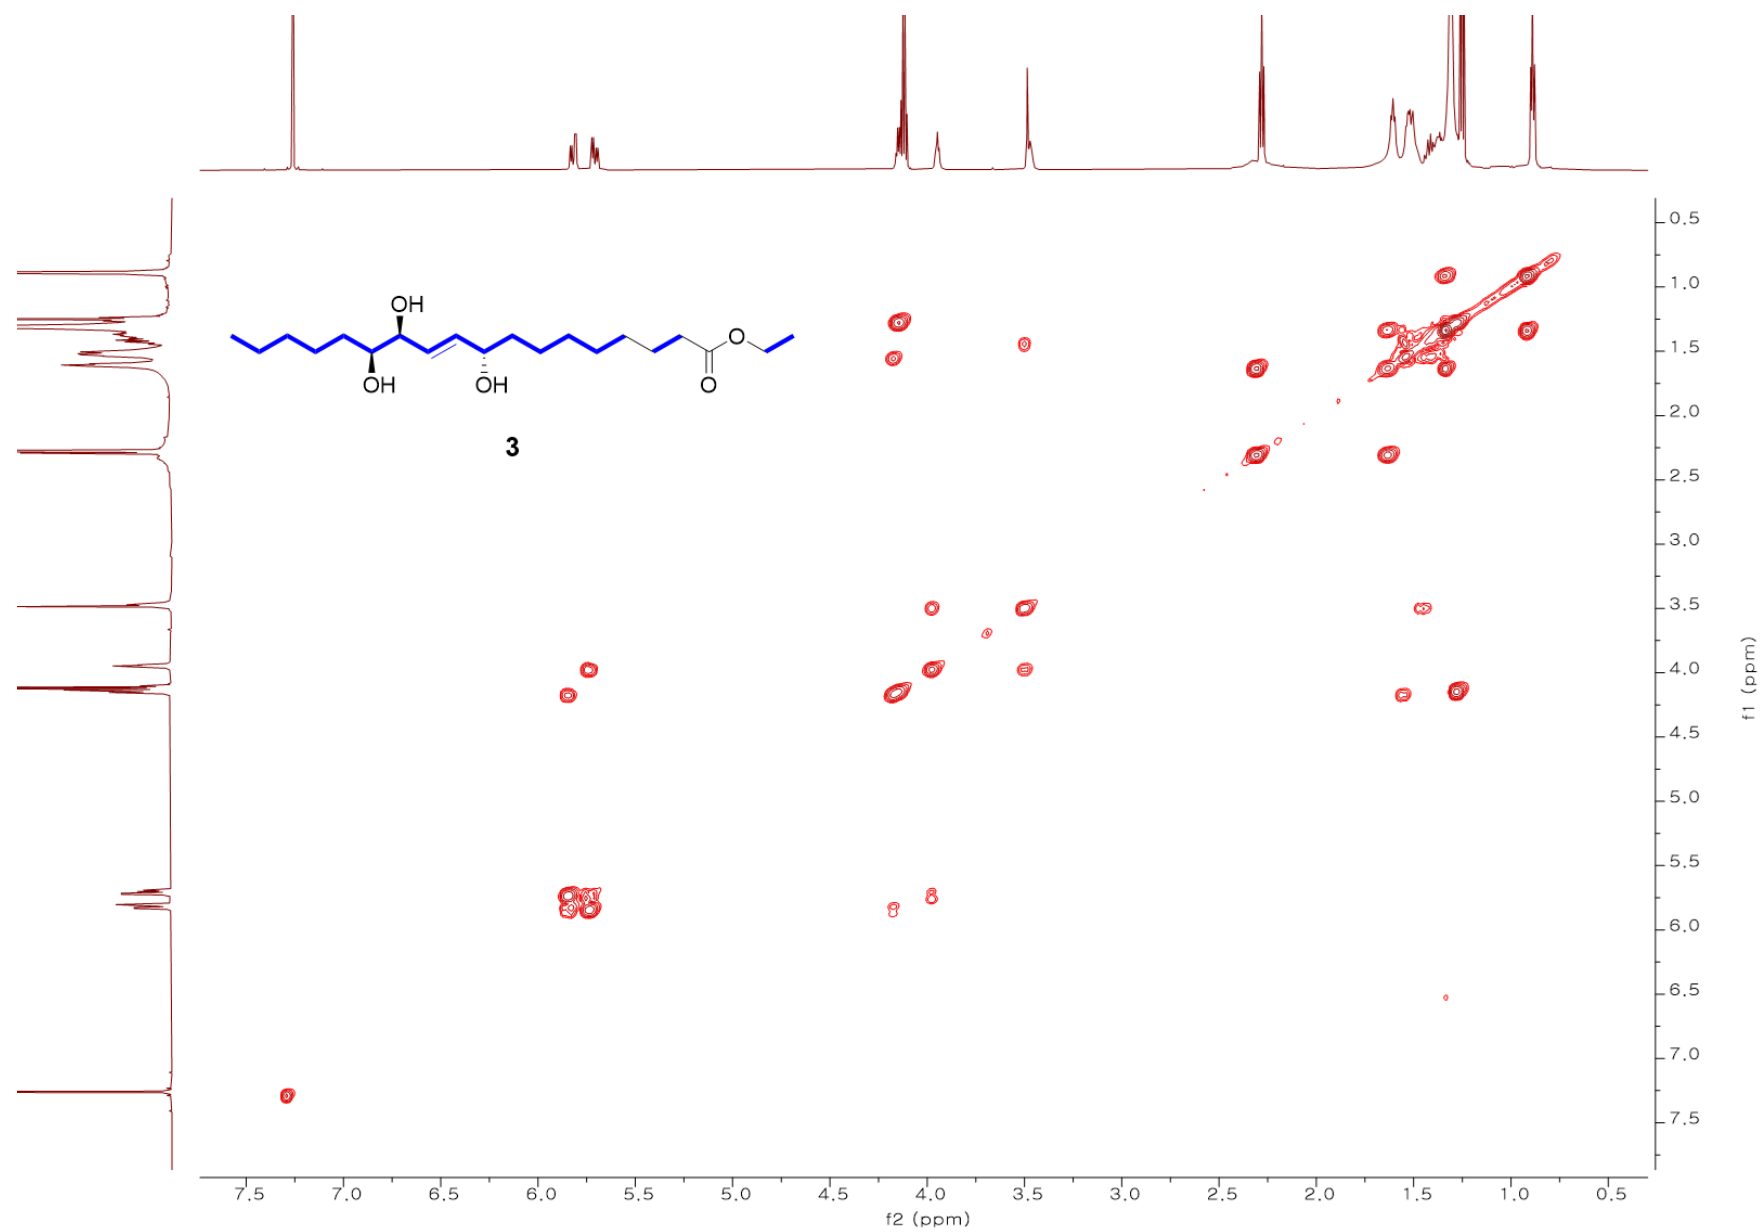

**Figure S17.** HSQC spectrum of **3** in chloroform-*d*

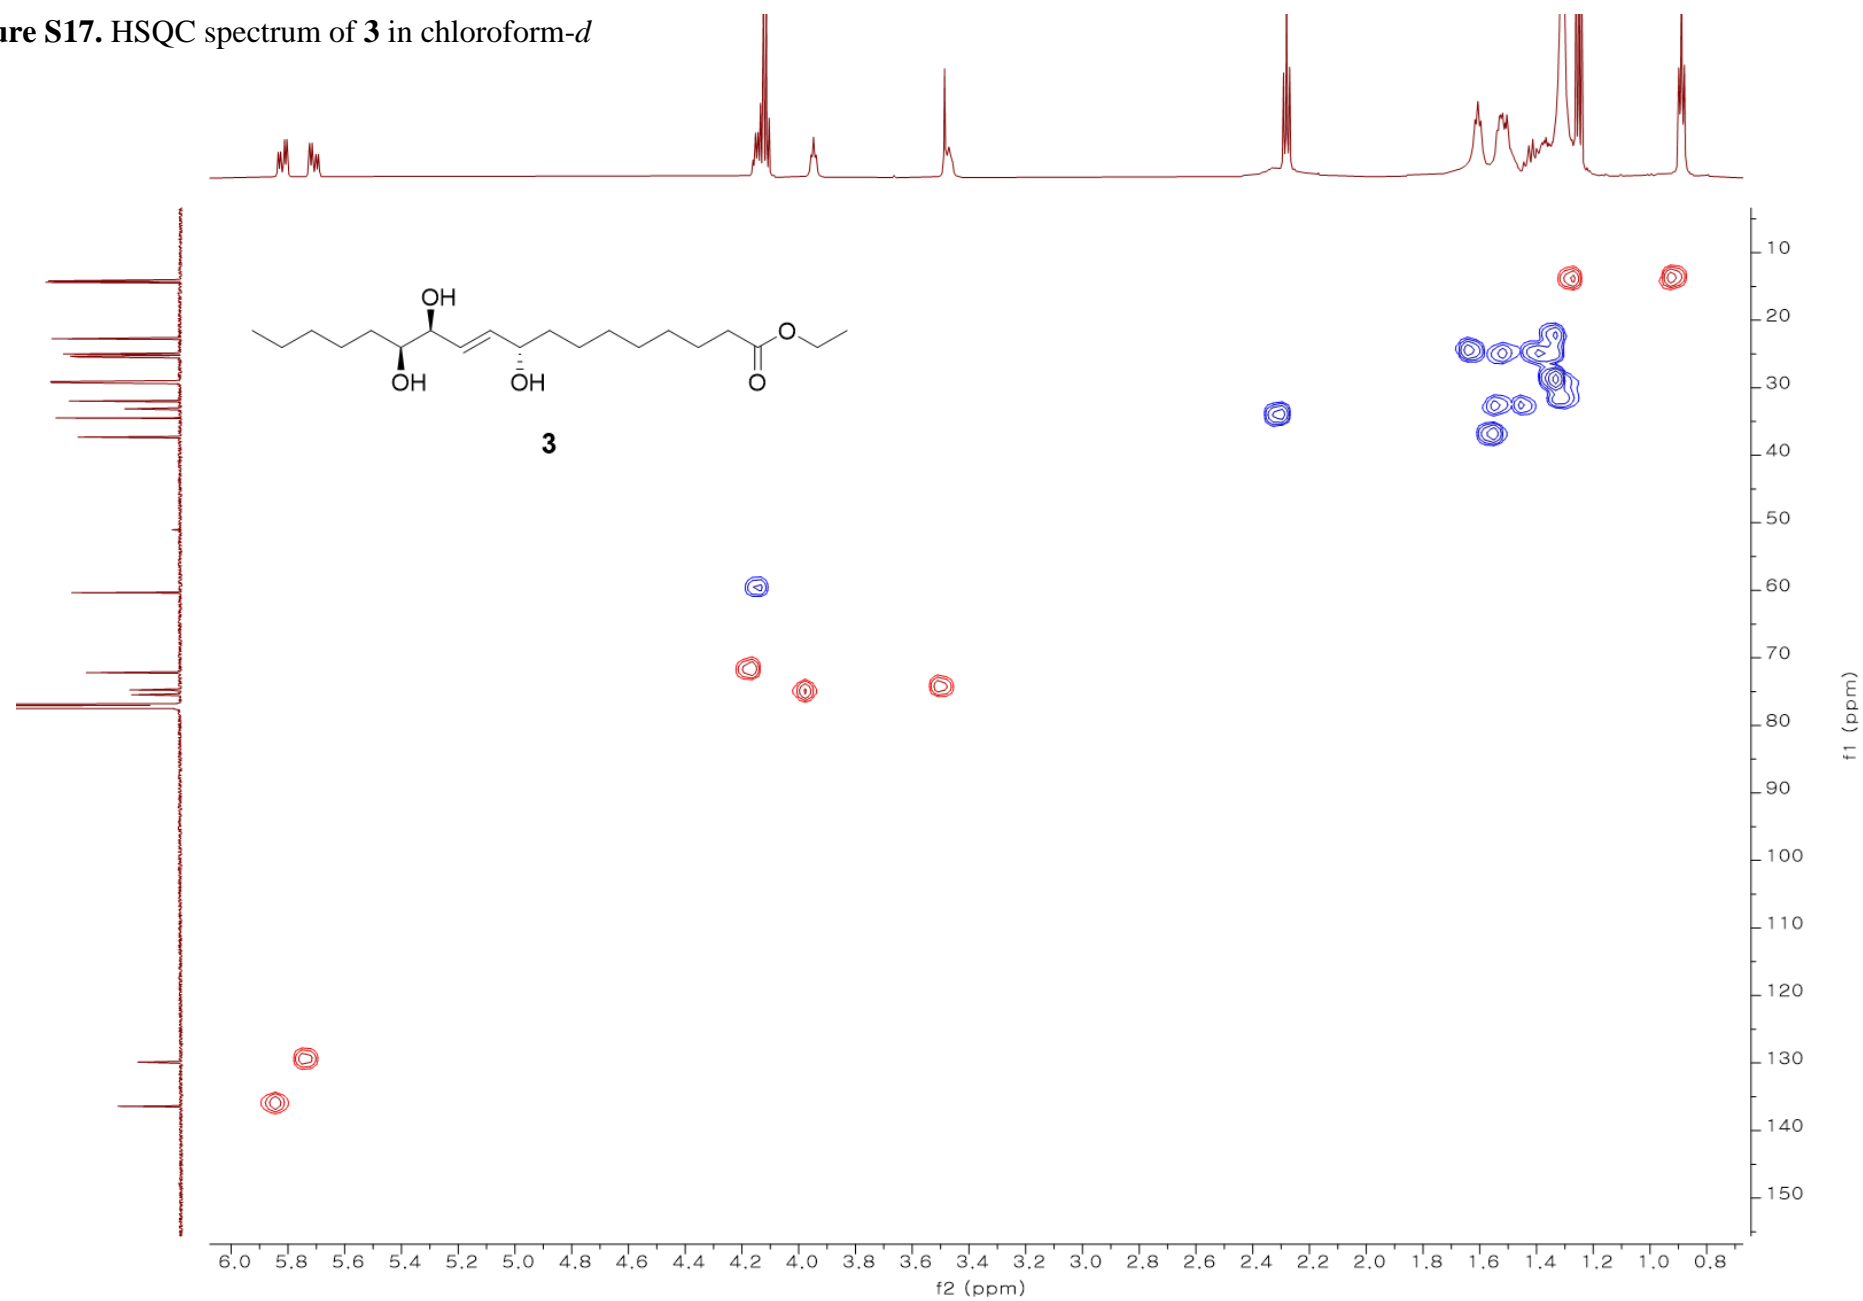

**Figure S18.** HMBC spectrum of **3** in chloroform-*d*

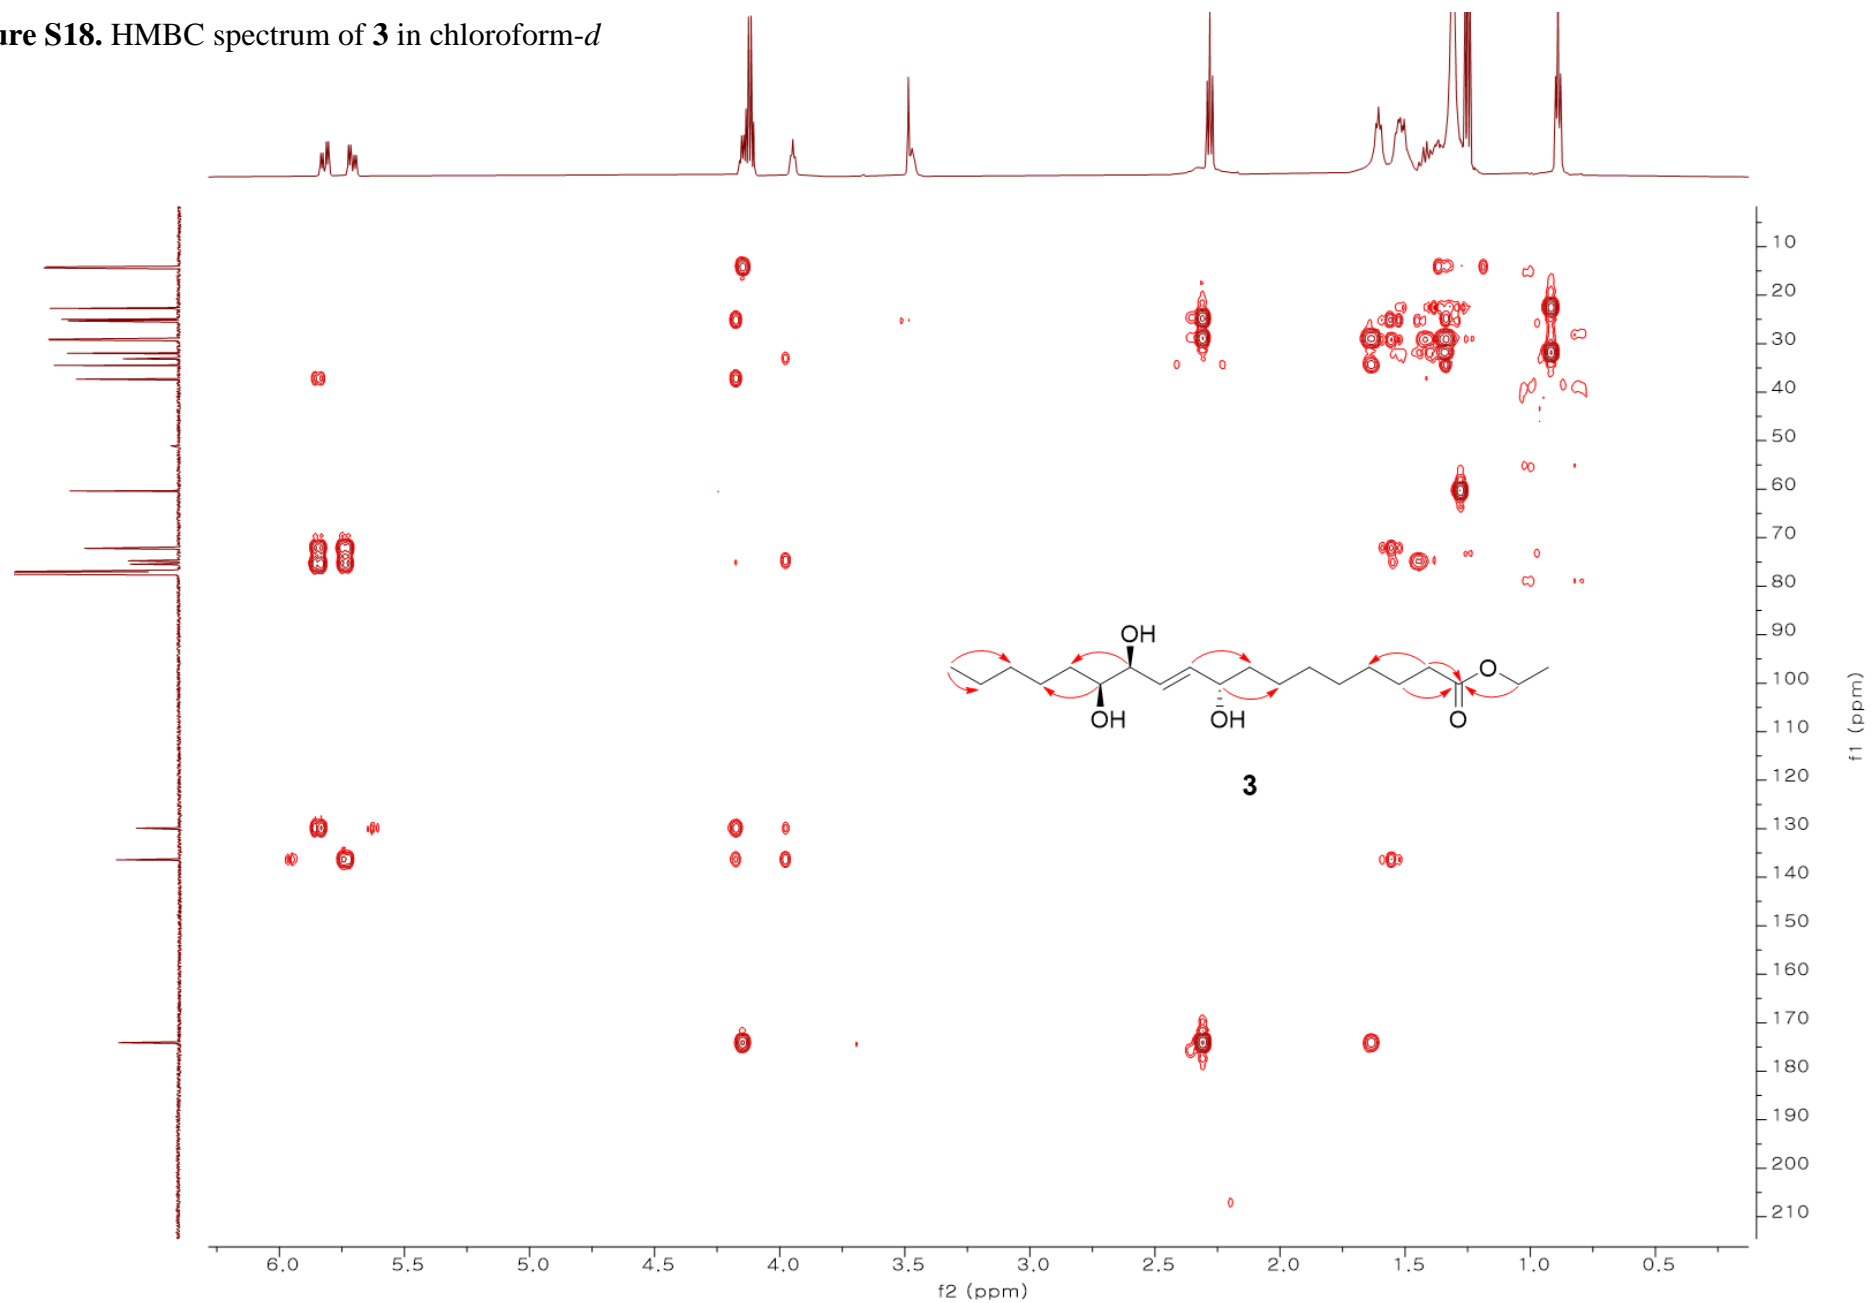

**Figure S19.** HRFABMS spectrum of **4**

140709\_MGCC17\_001-c1 #3-36 RT: 0.05-0.63 AV: 34 NL: 8.11E4  
T: + c FAB Full ms [319.50-470.50]

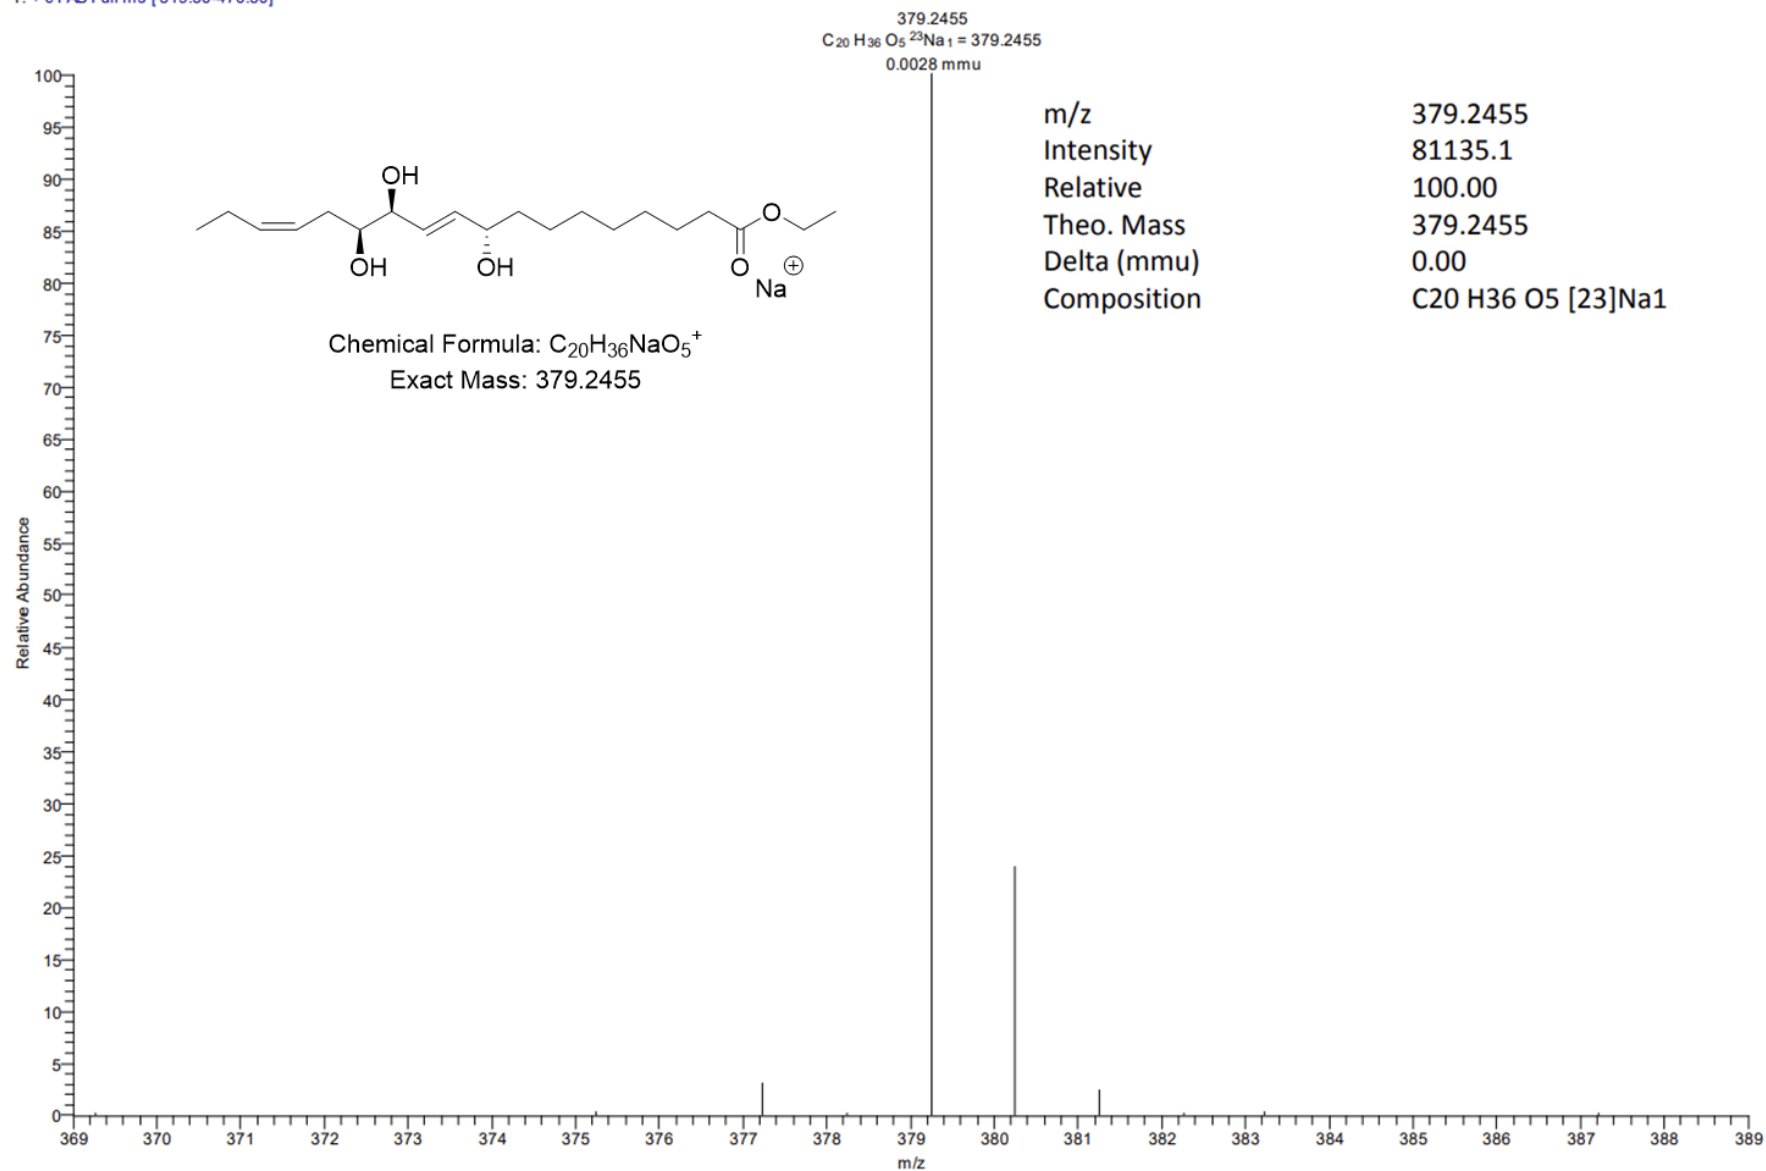

**Figure S20.**  $^1\text{H}$  NMR spectrum of **4** in chloroform- $d$  (700 MHz)

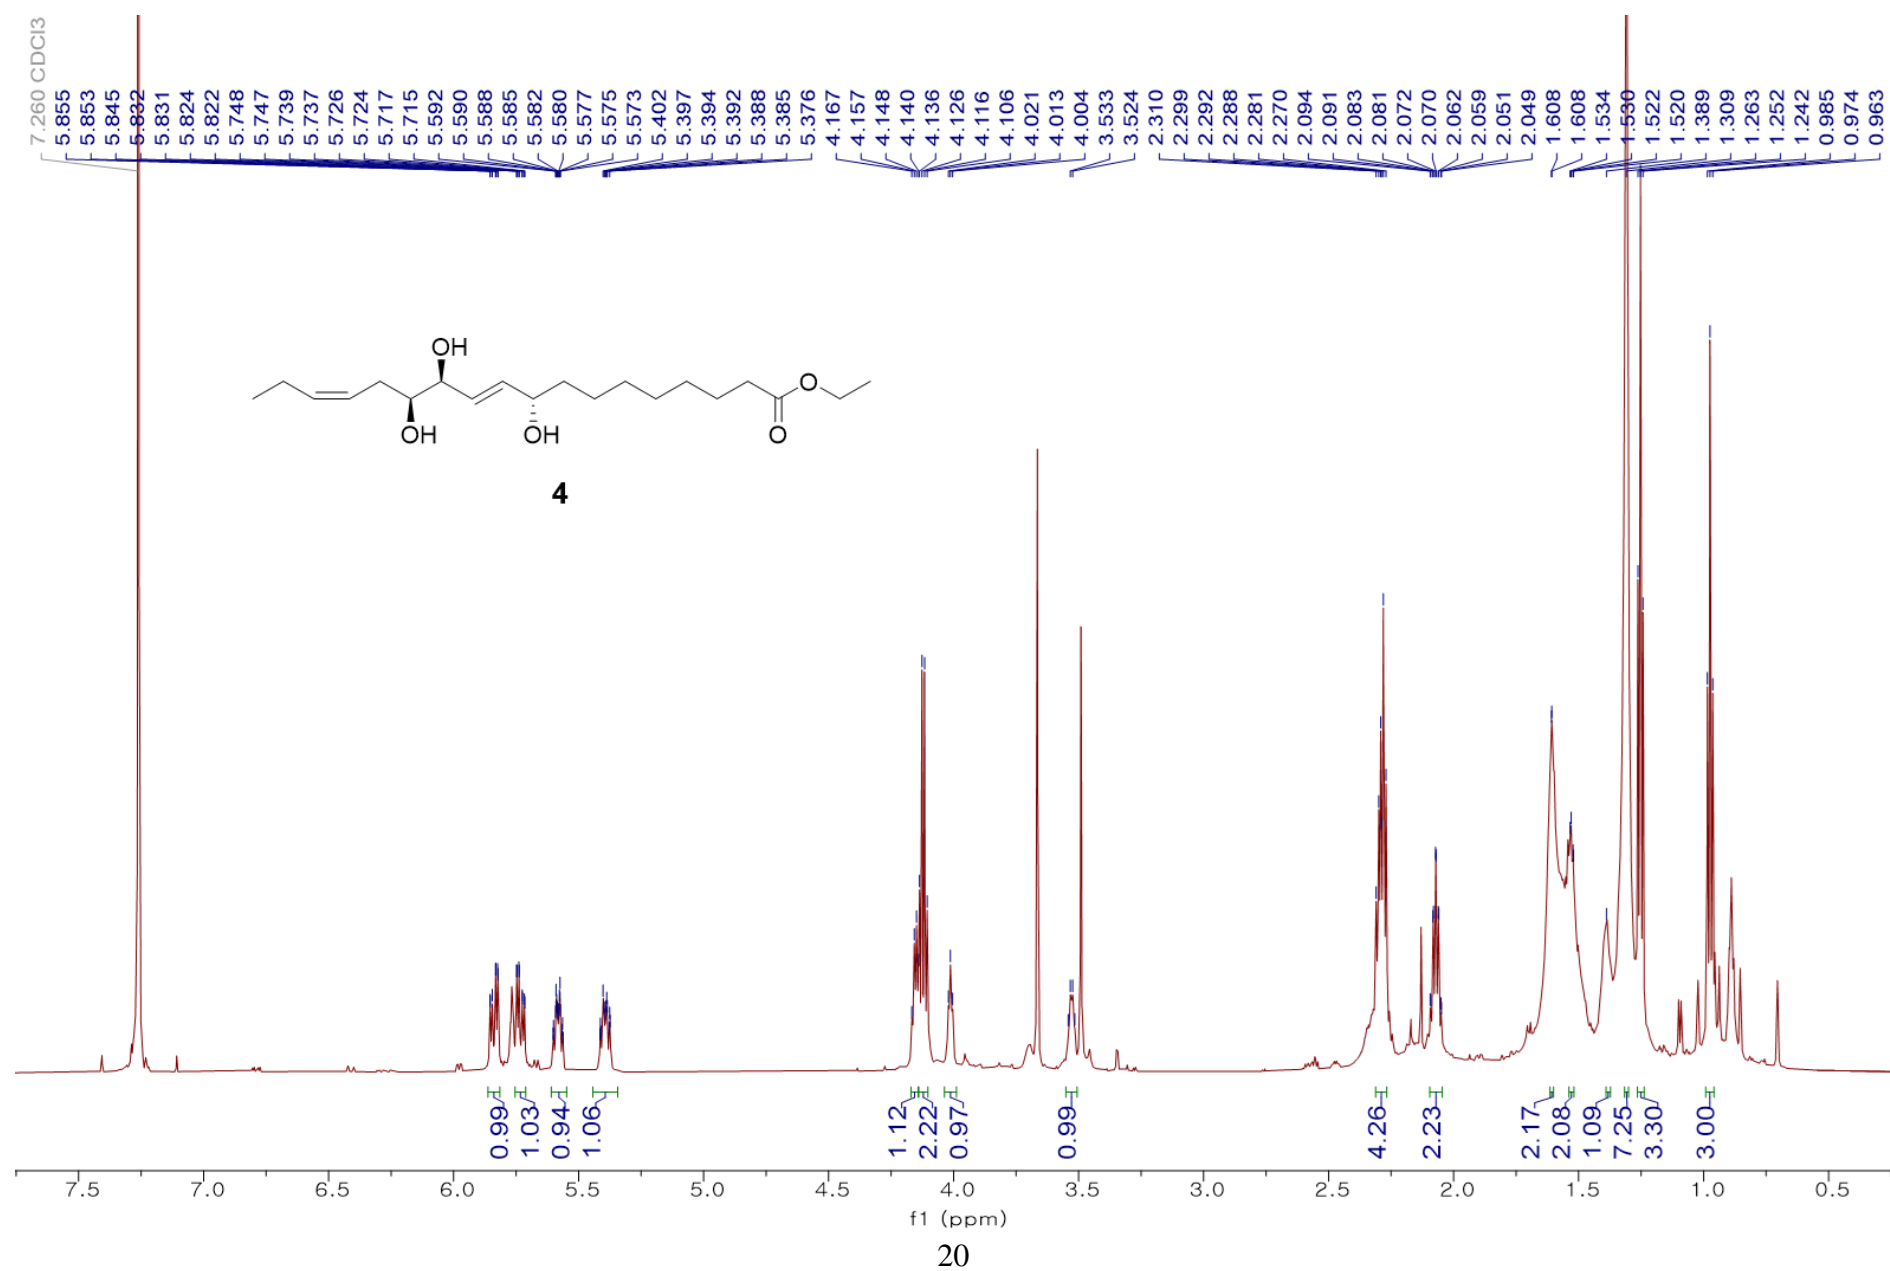

**Figure S21.**  $^{13}\text{C}$  NMR spectrum of **4** in chloroform-*d* (175 MHz)

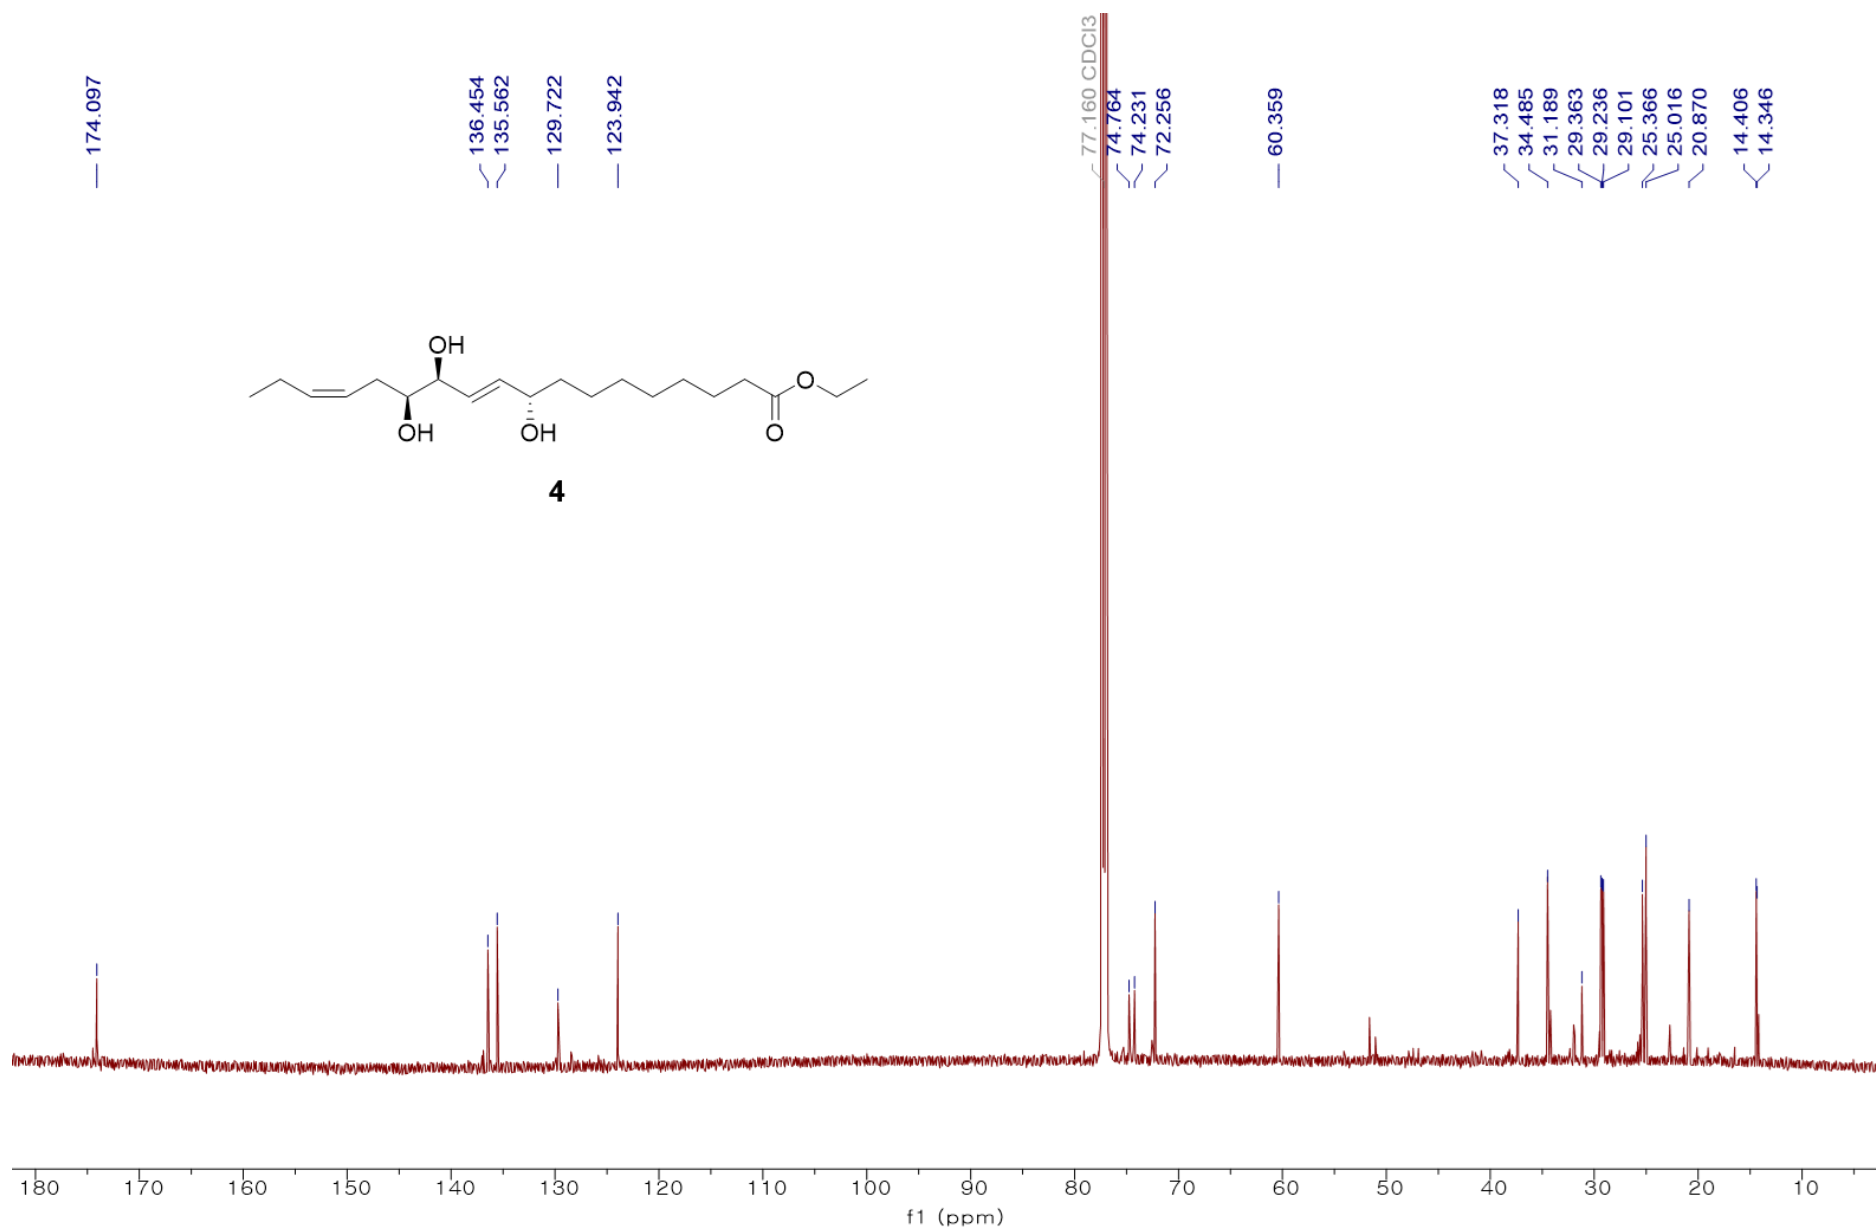

**Figure S22.** COSY spectrum of **4** in chloroform-*d*

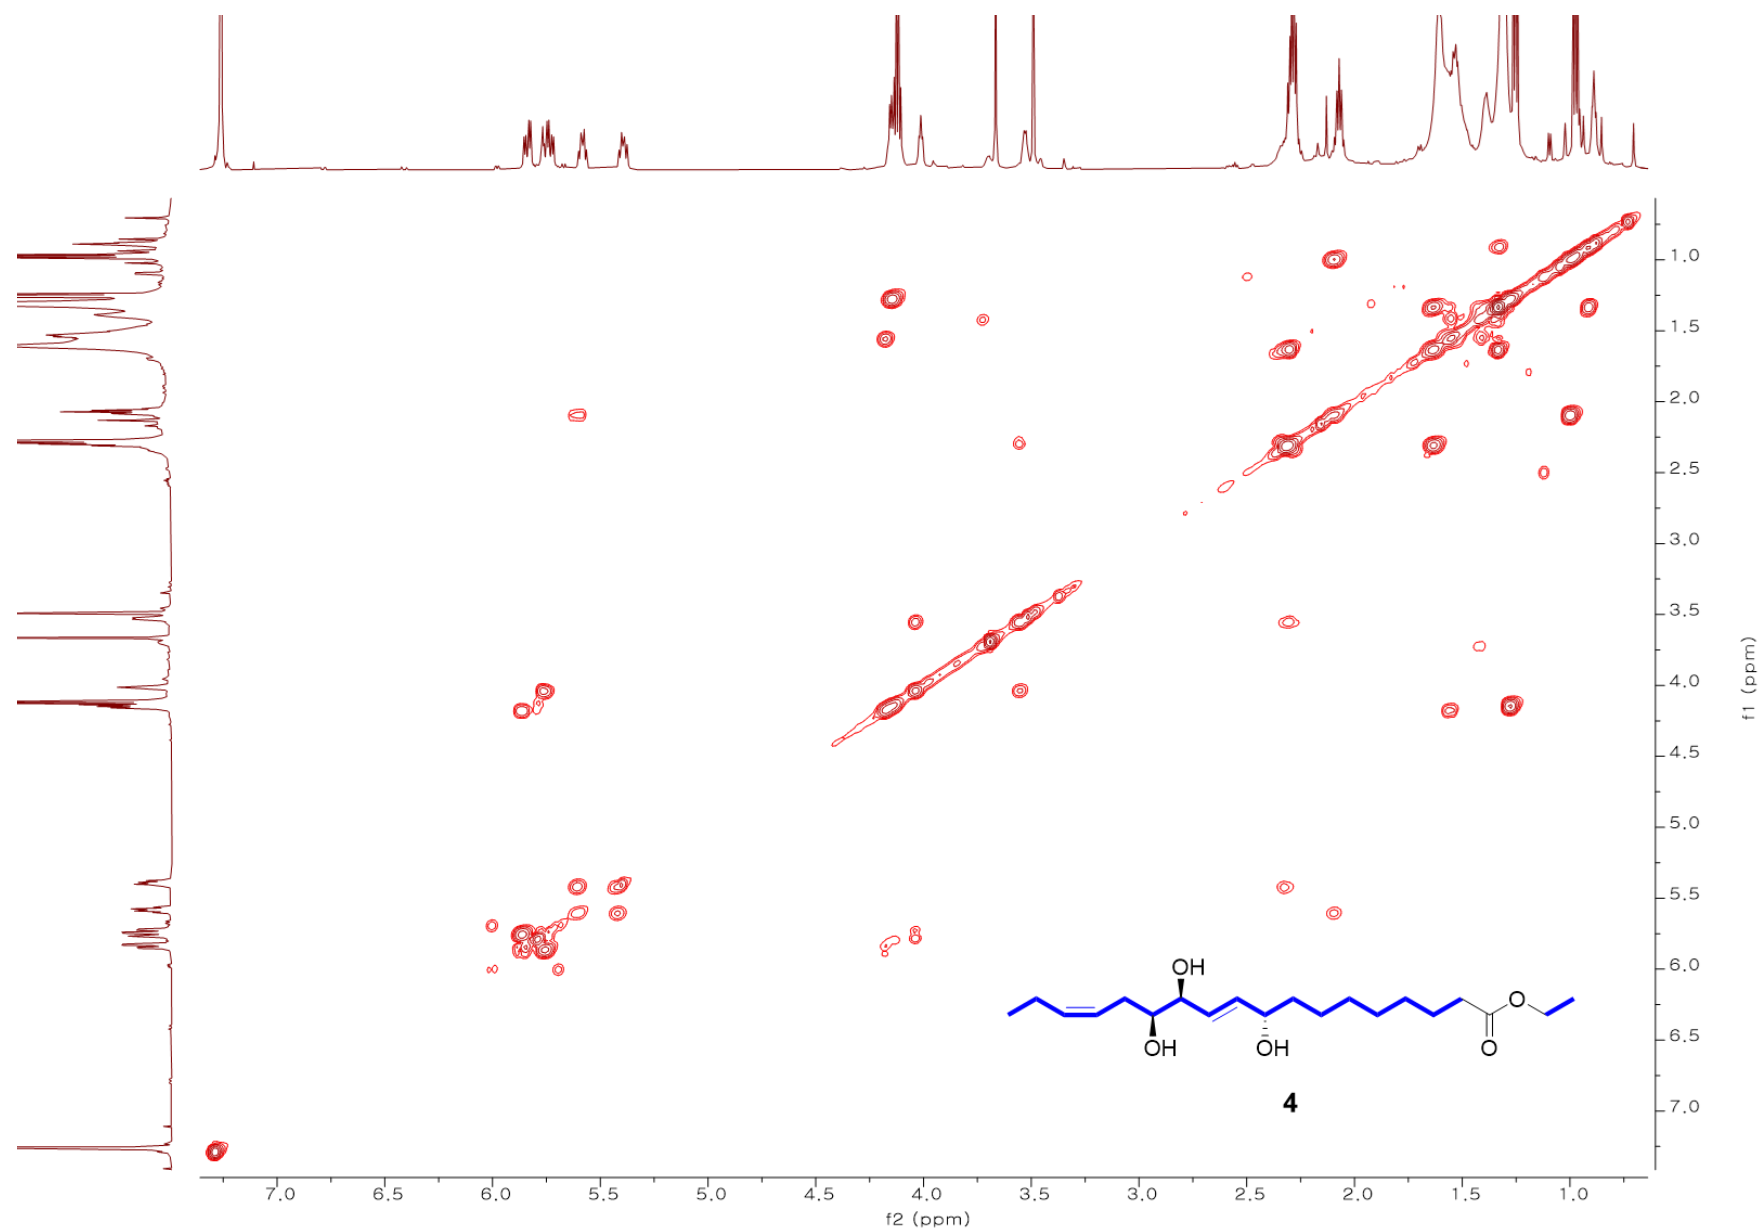



**Figure S23.** HSQC spectrum of **4** in chloroform-*d*

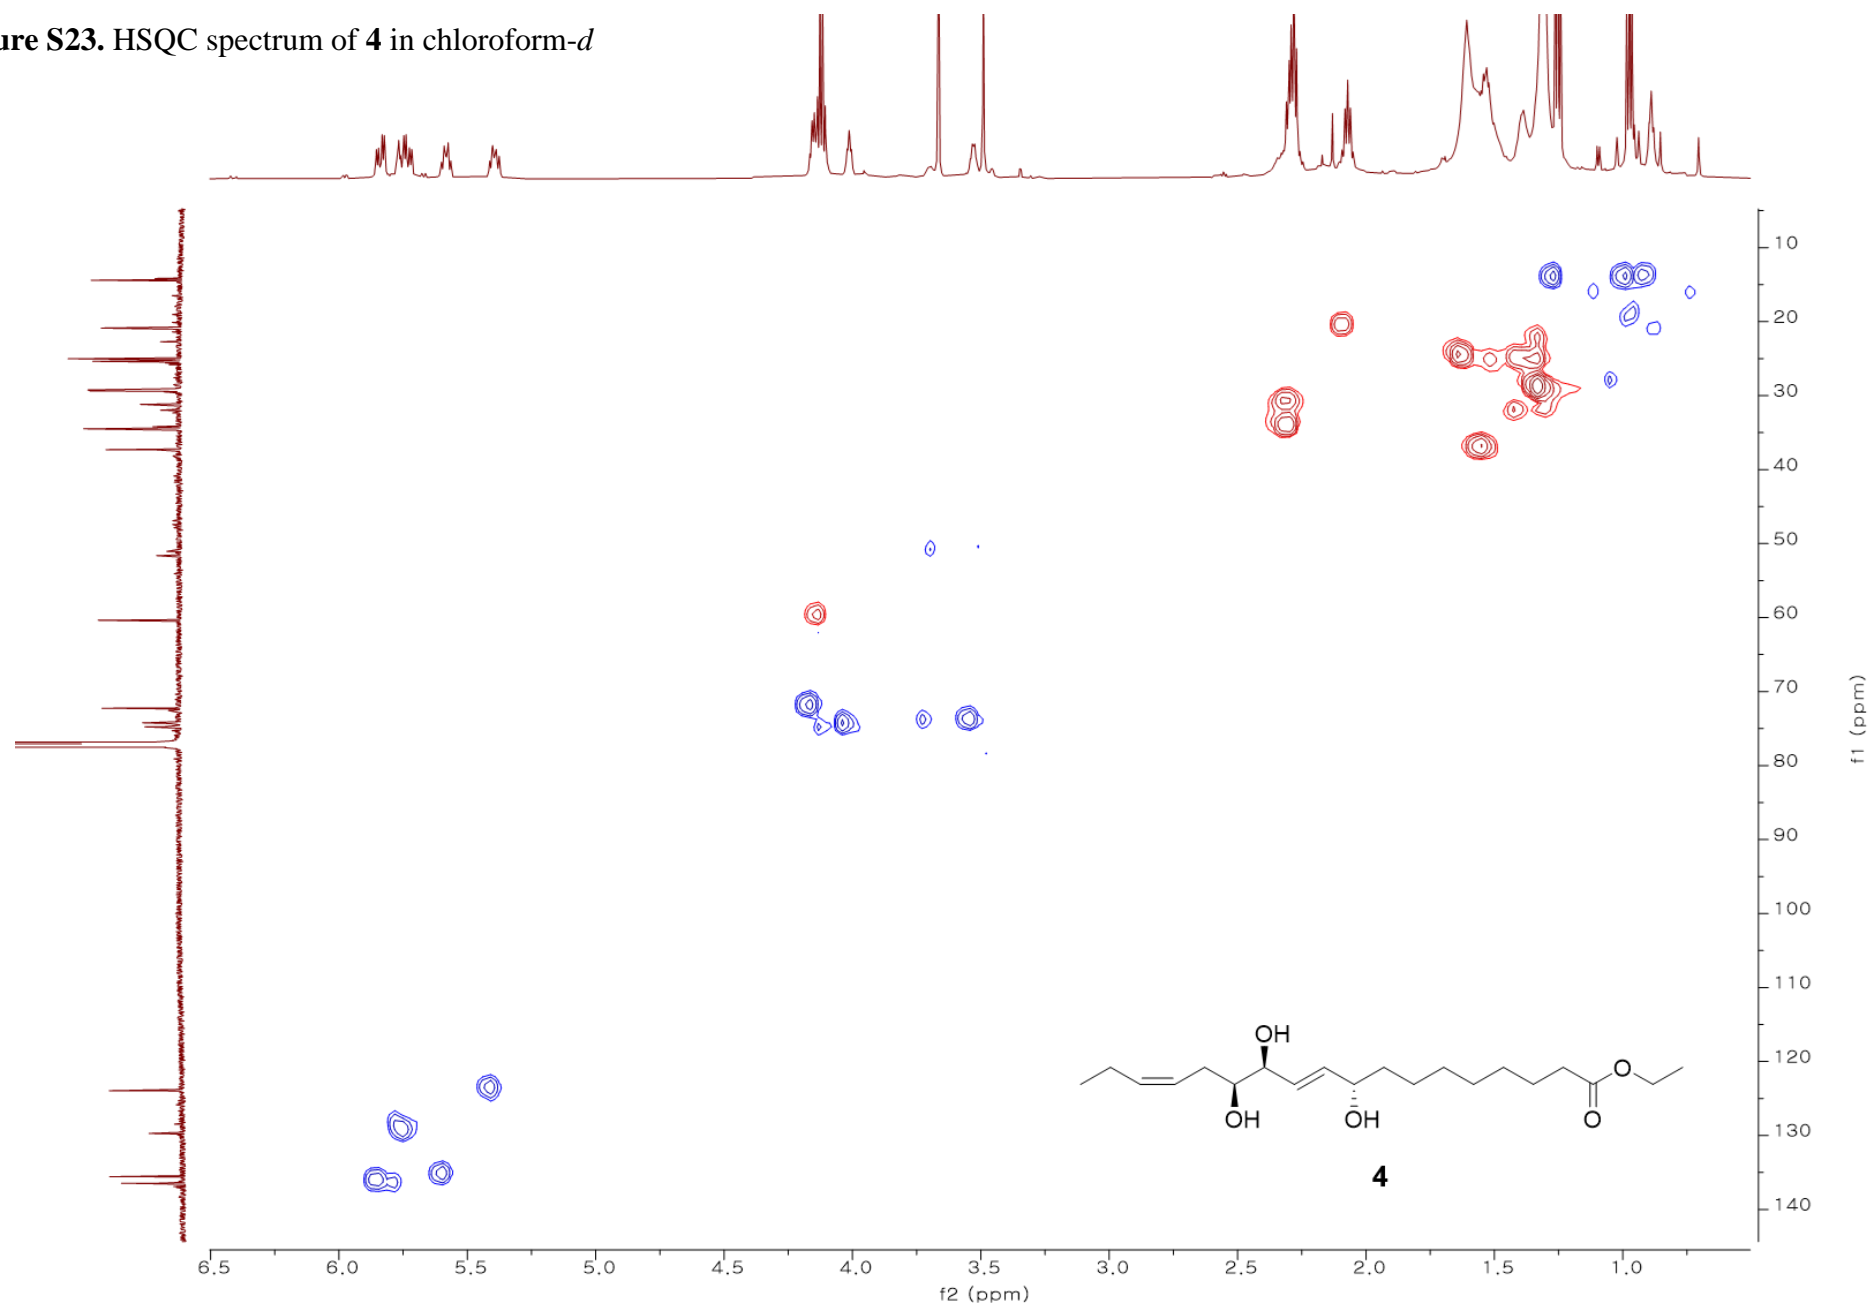

**Figure S24.** HMBC spectrum of **4** in chloroform-*d*

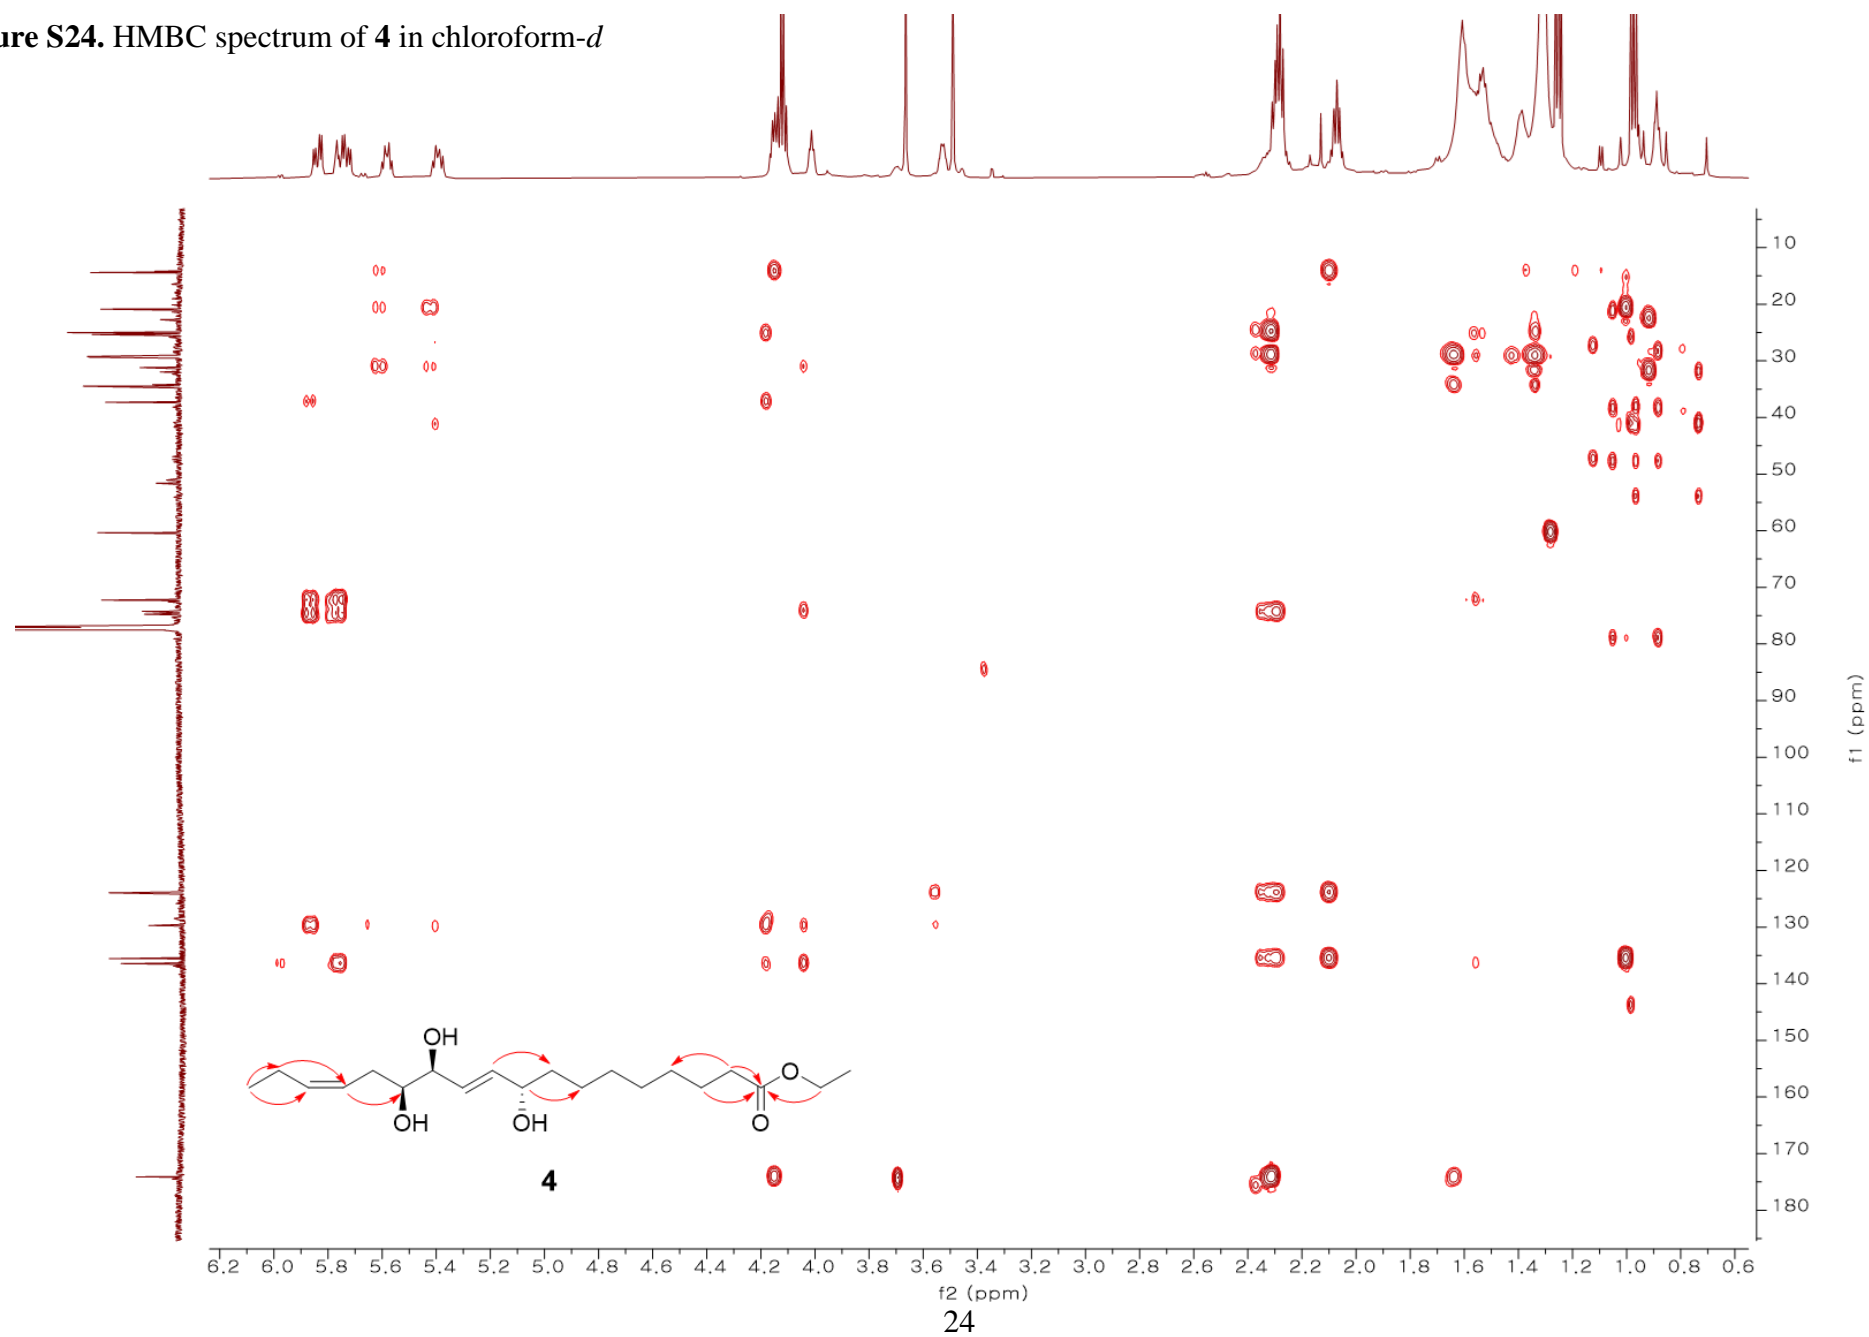

Supplement: s1 [file s1]
